# Supplementary material for: Comparison of the effectiveness of ISJ and SSR markers and detection of outlier loci in conservation genetics of Pulsatilla patens populations
Source: PeerJ. 2016 Nov 2;4:e2504. doi: 10.7717/peerj.2504 (PMC5101595; doi:10.7717/peerj.2504)
Supplement: Supplemental Information 9 [file peerj-04-2504-s009.xlsx]

## Sheet: SSR
8	345	17	15	23	60	11	5	40	10	62	19	36	14	9	7	6	9	9	10	1	345
			Pop 1	Pop 2	Pop 3	Pop 4	Pop 5	Pop 6	Pop 7	Pop 8	Pop 9	Pop 10	Pop 11	Pop 12	Pop 13	Pop 14	Pop 15	Pop 16	Pop 17
Sample no.	Pop. no.	Pul01		Pul02		Pul04		Pul05		Pul06		Pul07		Pul10		Pul11
80	1	165	165	331	331	227	227	241	241	163	163	335	335	97	97	302	302
82	1	163	163	327	327	224	224	240	240	161	161	334	334	94	94	298	298
83	1	164	164	327	327	225	225	240	240	162	162	333	333	97	97	298	298
84	1	164	164	326	326	223	223	241	241	162	162	332	332	95	95	296	296
85	1	163	163	326	326	223	223	241	241	162	162	334	334	97	97	296	296
86	1	165	165	326	326	224	224	241	241	162	162	333	333	97	97	296	296
87	1	165	165	326	326	221	224	241	241	162	162	333	333	97	97	296	296
88	1	165	165	326	326	221	224	241	241	161	161	334	334	97	97	298	298
89	1	165	165	327	327	222	222	243	243	162	162	333	333	95	95	298	298
90	1	165	165	329	329	222	222	241	241	161	161	334	334	97	97	299	299
91	1	166	166	331	331	227	227	243	243	163	163	336	336	98	98	300	300
92	1	165	165	330	330	223	227	241	241	162	162	334	334	97	97	299	299
93	1	167	167	327	327	225	225	241	241	161	161	334	334	0	0	298	298
94	1	165	165	327	327	225	225	241	241	161	161	332	332	95	95	296	296
95	1	165	165	326	326	223	223	241	241	161	161	331	331	97	97	296	296
75A	2	173	173	332	332	225	225	250	250	168	168	335	335	99	99	303	303
76A	2	172	172	331	331	224	231	250	250	168	168	335	335	99	99	303	303
77A	2	171	171	330	330	226	226	249	249	168	168	334	334	99	99	302	302
78A	2	171	171	329	329	224	231	249	249	168	168	334	334	99	99	302	302
79A	2	171	171	329	329	226	226	249	249	168	168	332	332	99	99	302	302
80A	2	171	171	329	329	227	227	249	249	168	168	333	333	100	100	302	302
81A	2	171	171	329	329	228	228	248	248	168	168	0	0	100	100	302	302
82A	2	171	171	329	329	229	229	248	248	0	0	0	0	100	100	302	302
83A	2	171	171	329	329	228	228	249	249	168	168	333	333	99	99	302	302
84A	2	171	171	330	330	226	226	250	250	168	168	334	334	99	99	302	302
31A	2	169	169	326	326	223	223	243	243	165	165	333	333	99	99	296	296
32A	2	169	169	327	327	219	221	243	243	164	164	334	334	98	98	296	296
33A	2	169	169	326	326	219	219	245	245	164	164	335	335	98	98	296	296
34A	2	169	169	327	327	220	220	243	243	164	164	334	334	98	98	296	296
35A	2	169	169	329	329	220	220	245	245	164	164	0	0	98	98	298	298
36A	2	171	171	331	331	221	221	245	245	164	164	335	335	98	98	299	299
37A	2	169	169	331	331	221	221	245	245	165	165	335	335	98	98	299	299
38A	2	168	168	329	329	221	221	245	245	165	165	334	334	98	98	296	296
39A	2	168	168	326	326	220	220	245	245	164	164	334	334	98	98	296	296
40A	2	168	168	326	326	221	221	245	245	164	164	334	334	98	98	296	296
41A	2	168	168	327	327	223	223	0	0	0	0	333	333	98	98	296	296
42A	2	168	168	327	327	225	225	0	0	0	0	334	334	99	99	296	296
43A	2	168	168	326	326	225	225	243	243	165	165	332	332	99	99	296	296
171	3	167	167	326	326	222	222	241	241	0	0	331	331	98	98	298	298
172	3	167	167	326	326	223	223	0	0	0	0	331	331	98	98	298	298
173	3	168	168	326	326	223	223	240	240	165	165	334	334	98	98	299	299
174	3	168	168	326	326	0	0	241	241	165	165	0	0	98	98	299	299
177	3	167	167	326	326	223	223	243	243	164	164	332	332	98	98	299	299
180	3	171	171	330	330	0	0	0	0	0	0	330	330	0	0	0	0
181	3	168	168	334	334	229	229	0	0	0	0	329	329	97	97	303	303
257A	3	166	166	331	331	224	228	245	245	162	162	330	330	97	97	299	299
258A	3	166	166	333	333	222	222	243	243	161	161	330	330	97	97	298	298
259A	3	166	166	329	329	222	228	243	243	162	162	331	331	97	97	299	299
260A	3	167	167	330	330	225	225	243	243	163	163	330	330	97	97	299	299
193	3	165	165	330	330	221	221	245	245	162	162	329	329	97	97	296	296
194	3	166	166	329	329	222	222	246	246	163	163	329	329	97	97	298	298
195	3	165	165	330	330	221	224	245	245	162	162	330	330	97	97	296	296
196	3	165	165	331	331	223	227	245	245	162	162	329	329	97	97	296	296
197	3	165	165	332	332	222	227	245	245	162	162	329	329	97	97	298	298
261A	3	166	166	330	330	221	228	243	243	162	162	329	329	97	97	298	298
262A	3	166	166	330	330	221	221	245	245	162	162	329	329	97	97	299	299
263A	3	166	166	330	330	221	224	245	245	162	162	331	331	95	95	299	299
264A	3	166	166	330	330	221	221	245	245	162	162	331	331	95	95	299	299
265A	3	166	166	330	330	222	228	245	245	161	161	332	332	95	95	299	299
266A	3	166	166	333	333	224	229	246	246	162	162	330	330	97	97	300	300
267A	3	171	171	334	334	224	224	245	245	165	165	331	331	97	97	302	302
268A	3	167	167	331	331	0	0	245	245	163	163	330	330	97	97	299	299
269A	3	167	167	330	330	221	224	245	245	164	164	331	331	95	95	298	298
270A	3	166	166	333	333	221	221	243	243	163	163	332	332	97	97	296	296
271A	3	167	167	329	329	222	222	245	245	163	163	331	331	97	97	296	296
272A	3	167	167	329	329	221	227	245	245	163	163	331	331	97	97	298	298
273A	3	167	167	330	330	221	227	245	245	164	164	330	330	95	95	296	296
182	3	167	167	332	332	223	229	0	0	0	0	329	329	95	95	300	300
274A	3	167	167	330	330	222	224	243	243	164	164	332	332	97	97	298	298
275A	3	166	166	329	329	223	223	243	243	163	163	332	332	95	95	296	296
276A	3	166	166	330	330	221	221	245	245	163	163	332	332	95	95	298	298
277A	3	166	166	331	331	222	228	245	245	163	163	332	332	95	95	298	298
278A	3	167	167	333	333	225	225	245	245	163	163	332	332	97	97	300	300
279A	3	168	168	334	334	225	231	246	246	163	163	332	332	97	97	302	302
280A	3	166	166	332	332	222	222	245	245	162	162	332	332	95	95	298	298
281A	3	166	166	330	330	222	222	243	243	163	163	334	334	97	97	298	298
282A	3	165	165	333	333	221	224	245	245	162	162	332	332	97	97	296	296
283A	3	166	166	330	330	221	224	245	245	162	162	332	332	97	97	298	298
284A	3	166	166	329	329	222	222	245	245	163	163	332	332	97	97	298	298
198	3	166	166	333	333	223	223	245	245	162	162	329	329	97	97	300	300
199	3	167	167	334	334	224	224	243	243	163	163	329	329	97	97	302	302
200	3	166	166	333	333	221	221	243	243	162	162	331	331	97	97	298	298
201	3	166	166	332	332	223	223	243	243	162	162	0	0	97	97	298	298
202	3	166	166	333	333	220	226	243	243	162	162	329	329	97	97	296	296
203	3	166	166	330	330	221	221	243	243	162	162	330	330	97	97	296	296
204	3	166	166	330	330	221	221	243	243	162	162	328	328	97	97	296	296
205	3	166	166	330	330	226	226	243	243	162	162	328	328	97	97	296	296
206	3	167	167	330	330	221	226	243	243	163	163	329	329	97	97	296	296
207	3	166	166	330	330	221	221	243	243	162	162	330	330	97	97	296	296
208	3	166	166	331	331	221	221	243	243	162	162	330	330	97	97	296	296
209	3	166	166	332	332	221	221	243	243	162	162	329	329	97	97	298	298
210	3	167	167	333	333	222	225	243	243	162	162	331	331	97	97	299	299
211	3	175	175	331	331	224	230	249	249	168	168	330	330	100	100	308	308
212	3	174	174	331	331	224	228	248	248	164	164	330	330	99	99	305	305
213	3	173	173	332	332	224	224	246	246	164	164	328	328	97	97	303	303
214	3	174	174	332	332	226	232	248	248	167	167	331	331	98	98	302	302
215	3	172	172	332	332	226	231	246	246	164	164	331	331	97	97	300	300
216	3	172	172	332	332	224	228	246	246	164	164	331	331	97	97	300	300
125A	4	169	169	326	326	222	222	245	245	165	165	334	334	99	99	296	296
126A	4	168	168	326	326	219	219	245	245	164	164	334	334	99	99	296	296
127A	4	168	168	326	326	219	219	245	245	164	164	334	334	98	98	296	296
128A	4	168	168	326	326	219	219	245	245	164	164	334	334	98	98	296	296
129A	4	169	169	327	327	221	221	245	245	164	164	335	335	98	98	298	298
130A	4	171	171	332	332	0	0	245	245	165	165	336	336	98	98	302	302
131A	4	169	169	330	330	219	225	245	245	164	164	334	334	98	98	299	299
133A	4	167	167	326	326	221	221	245	245	164	164	334	334	98	98	296	296
134A	4	167	167	326	326	221	221	243	243	165	165	334	334	98	98	296	296
135A	4	167	167	326	326	222	222	243	243	165	165	333	333	99	99	296	296
136A	4	167	167	0	0	222	222	245	245	165	165	334	334	99	99	296	296
293A	5	168	168	326	326	223	223	243	243	164	164	334	334	98	98	296	296
294A	5	168	168	326	326	222	226	0	0	164	164	334	334	99	99	296	296
295A	5	168	168	326	326	222	226	0	0	164	164	334	334	99	99	296	296
145A	5	168	168	326	326	223	223	245	245	164	164	335	335	99	99	296	296
146A	5	168	168	326	326	223	223	245	245	164	164	335	335	99	99	296	296
96	6	173	173	332	332	223	229	249	249	168	168	335	335	98	98	300	300
98	6	173	173	331	331	224	224	249	249	167	167	333	333	98	98	300	300
99	6	173	173	331	331	223	228	249	249	167	167	333	333	98	98	300	300
103	6	173	173	330	330	223	228	248	248	165	165	332	332	98	98	300	300
105	6	174	174	330	330	222	225	248	248	165	165	332	332	98	98	300	300
106	6	174	174	330	330	225	225	246	246	165	165	334	334	98	98	300	300
107	6	173	173	330	330	222	228	249	249	165	165	332	332	98	98	299	299
108	6	173	173	330	330	223	223	249	249	164	164	331	331	98	98	299	299
109	6	173	173	330	330	222	228	249	249	165	165	332	332	98	98	299	299
111	6	173	173	330	330	222	222	248	248	165	165	332	332	98	98	299	299
114	6	172	172	330	330	222	222	248	248	165	165	332	332	98	98	299	299
116	6	173	173	330	330	221	221	248	248	168	168	333	333	98	98	299	299
118	6	172	172	333	333	222	228	248	248	168	168	334	334	98	98	302	302
120	6	172	172	332	332	224	224	0	0	167	167	332	332	97	97	302	302
121	6	172	172	332	332	222	222	249	249	167	167	332	332	98	98	302	302
124	6	172	172	331	331	222	227	248	248	165	165	331	331	97	97	302	302
126	6	172	172	331	331	221	227	248	248	165	165	331	331	97	97	300	300
128	6	172	172	331	331	221	221	246	246	165	165	330	330	97	97	300	300
130	6	172	172	331	331	221	227	248	248	165	165	330	330	97	97	300	300
131	6	172	172	331	331	222	222	249	249	165	165	330	330	97	97	300	300
133	6	172	172	331	331	222	222	250	250	165	165	330	330	97	97	300	300
136	6	172	172	331	331	223	223	248	248	165	165	330	330	97	97	300	300
138	6	172	172	331	331	221	221	249	249	167	167	331	331	97	97	300	300
140	6	172	172	333	333	221	221	249	249	168	168	332	332	98	98	300	300
142	6	172	172	332	332	223	223	250	250	168	168	332	332	98	98	300	300
143	6	171	171	330	330	222	222	251	251	168	168	332	332	98	98	299	299
144	6	172	172	330	330	223	223	250	250	168	168	332	332	99	99	299	299
149	6	172	172	329	329	224	224	248	248	167	167	330	330	98	98	299	299
150	6	172	172	329	329	221	221	248	248	165	165	330	330	98	98	298	298
152	6	172	172	329	329	222	222	248	248	165	165	331	331	98	98	299	299
154	6	172	172	329	329	222	222	248	248	167	167	330	330	98	98	299	299
156	6	172	172	330	330	223	223	249	249	165	165	331	331	98	98	299	299
158	6	172	172	330	330	223	223	248	248	165	165	330	330	98	98	299	299
160	6	171	171	329	329	222	222	248	248	167	167	330	330	98	98	299	299
163	6	171	171	330	330	221	221	248	248	167	167	330	330	98	98	299	299
166	6	172	172	331	331	221	221	249	249	168	168	331	331	98	98	299	299
167	6	172	172	330	330	222	222	250	250	168	168	333	333	99	99	300	300
168	6	172	172	330	330	222	223	250	250	167	167	331	331	99	99	299	299
169	6	172	172	330	330	221	221	248	248	167	167	331	331	98	98	299	299
170	6	172	172	329	329	222	228	250	250	165	165	332	332	98	98	299	299
183	7	165	165	330	330	226	226	245	245	163	163	334	334	98	98	298	298
184	7	165	165	327	327	222	222	243	243	161	161	332	332	98	98	296	296
185	7	165	165	326	326	221	221	243	243	161	161	332	332	97	97	296	296
186	7	165	165	326	326	222	222	243	243	161	161	332	332	97	97	296	296
187	7	165	165	326	326	222	222	243	243	161	161	330	330	97	97	296	296
188	7	165	165	326	326	220	226	243	243	161	161	330	330	97	97	296	296
189	7	165	165	326	326	221	221	243	243	161	161	331	331	98	98	296	296
190	7	165	165	326	326	223	223	243	243	161	161	332	332	98	98	296	296
191	7	165	165	327	327	221	221	243	243	161	161	330	330	98	98	296	296
192	7	167	167	329	329	221	226	243	243	161	161	332	332	98	98	299	299
17A	8	172	172	330	330	226	226	246	246	164	164	332	332	97	97	302	302
18A	8	173	173	331	331	0	0	245	248	165	165	332	332	98	98	303	303
19A	8	174	174	331	331	0	0	246	246	167	167	331	331	98	98	305	305
20A	8	176	176	331	331	226	226	250	250	168	168	329	329	100	100	308	308
233A	8	167	167	331	331	223	223	248	248	168	168	332	332	99	99	298	298
234A	8	172	172	332	332	0	0	249	249	168	168	332	332	99	99	296	296
235A	8	169	169	330	330	223	223	248	248	167	167	332	332	99	99	296	296
236A	8	169	169	330	330	0	0	249	249	168	168	332	332	99	99	296	296
237A	8	168	168	331	331	222	222	248	248	167	167	332	332	100	100	296	296
238A	8	169	169	330	330	221	221	248	248	167	167	334	334	99	99	300	300
239A	8	168	168	331	331	0	0	248	248	167	167	331	331	99	99	298	298
240A	8	169	169	331	331	0	0	248	248	167	167	332	332	99	99	298	298
241A	8	168	168	330	330	223	223	246	246	167	167	332	332	98	98	298	298
242A	8	168	168	332	332	224	224	249	249	167	167	331	331	99	99	298	298
14A	8	172	172	332	332	228	230	245	245	164	164	330	330	97	97	302	302
15A	8	172	172	331	331	225	231	246	246	164	164	330	330	97	97	302	302
16A	8	172	172	331	331	0	0	243	246	164	164	332	332	97	97	302	302
243A	8	168	168	332	332	223	223	249	249	167	167	330	330	99	99	298	298
244A	8	167	167	330	330	223	228	249	249	168	168	329	329	99	99	298	298
245A	8	167	167	330	330	222	228	248	248	168	168	330	330	99	99	296	296
246A	8	171	171	331	331	222	222	250	250	167	167	330	330	98	98	296	296
247A	8	169	169	330	330	223	223	248	248	168	168	330	330	98	98	296	296
248A	8	169	169	329	329	223	228	248	248	168	168	330	330	99	99	296	296
249A	8	169	169	330	330	222	227	248	248	168	168	332	332	99	99	298	298
250A	8	169	169	331	331	0	0	248	248	167	167	330	330	99	99	300	300
251A	8	168	168	329	329	221	224	246	246	167	167	330	330	99	99	299	299
252A	8	169	169	331	331	226	226	248	248	167	167	331	331	99	99	298	298
214A	8	172	172	330	330	227	230	246	246	165	165	330	330	98	98	302	302
215A	8	172	172	330	330	227	227	246	246	165	165	330	330	98	98	302	302
22A	8	173	173	330	330	225	225	246	246	165	165	332	332	99	99	302	302
23A	8	174	174	332	332	228	228	248	248	168	168	332	332	99	99	302	302
24A	8	172	172	332	332	224	227	246	246	165	165	332	332	98	98	300	300
201A	8	172	172	331	331	224	227	246	246	165	165	331	331	98	98	300	300
202A	8	172	172	331	331	226	226	246	246	165	165	331	331	98	98	300	300
203A	8	172	172	331	331	224	227	246	246	165	165	331	331	98	98	300	300
204A	8	172	172	331	331	225	225	246	246	165	165	332	332	98	98	300	300
205A	8	173	173	331	331	225	225	246	246	165	165	333	333	98	98	302	302
206A	8	174	174	331	331	223	223	246	246	165	165	332	332	99	99	302	302
207A	8	174	174	331	331	223	223	249	249	168	168	332	332	99	99	303	303
208A	8	175	175	330	330	226	226	250	250	168	168	332	332	100	100	302	302
209A	8	174	174	330	330	225	225	248	248	165	165	331	331	100	100	302	302
210A	8	173	173	331	331	228	228	246	246	165	165	330	330	98	98	302	302
211A	8	174	174	332	332	228	232	248	248	168	168	331	331	98	98	303	303
212A	8	172	172	332	332	224	224	246	246	165	165	330	330	98	98	302	302
213A	8	172	172	331	331	227	227	246	246	165	165	330	330	98	98	302	302
216A	8	172	172	331	331	225	231	246	246	165	165	332	332	98	98	300	300
217A	8	172	172	331	331	227	227	246	246	165	165	330	330	99	99	302	302
218A	8	173	173	330	330	227	227	246	246	165	165	330	330	99	99	302	302
219A	8	173	173	330	330	225	228	248	248	168	168	332	332	99	99	302	302
220A	8	175	175	330	330	223	228	249	249	168	168	332	332	102	102	300	300
221A	8	174	174	330	330	223	223	248	248	165	165	332	332	99	99	299	299
222A	8	173	173	330	330	226	226	245	245	164	164	331	331	99	99	302	302
223A	8	174	174	332	332	226	230	246	246	167	167	333	333	99	99	302	302
224A	8	172	172	331	331	223	229	246	246	164	164	332	332	99	99	302	302
225A	8	172	172	331	331	223	228	246	246	164	164	331	331	98	98	300	300
226A	8	172	172	330	330	224	224	245	245	164	164	332	332	98	98	300	300
227A	8	172	172	331	331	223	229	246	246	164	164	333	333	98	98	300	300
228A	8	172	172	329	329	223	229	246	246	164	164	332	332	98	98	300	300
229A	8	173	173	331	331	222	222	246	246	164	164	332	332	99	99	300	300
230A	8	173	173	330	330	224	224	246	246	165	165	334	334	99	99	299	299
231A	8	168	168	332	332	224	224	248	248	167	167	332	332	99	99	299	299
232A	8	168	168	331	331	221	221	246	246	168	168	331	331	98	98	299	299
137A	9	167	167	329	329	224	224	241	246	162	162	331	331	99	99	298	298
138A	9	166	166	326	326	223	223	243	243	162	162	330	330	99	99	296	296
139A	9	166	166	327	327	224	224	245	245	162	162	330	330	98	98	298	298
140A	9	167	167	327	327	224	224	241	245	163	163	330	330	99	99	298	298
141A	9	166	166	327	327	223	223	243	243	162	162	331	331	98	98	298	298
142A	9	167	167	327	327	224	224	243	243	162	162	332	332	99	99	298	298
143A	9	166	166	329	329	224	224	245	245	162	162	331	331	99	99	298	298
144A	9	167	167	329	329	224	224	243	243	163	163	332	332	99	99	298	298
190A	9	166	166	327	327	225	225	245	245	162	162	330	330	99	99	299	299
191A	9	168	168	331	331	227	227	246	246	163	163	331	331	99	99	302	302
192A	9	169	169	331	331	225	225	246	246	165	165	331	331	99	99	300	300
193A	9	168	168	329	329	223	223	243	246	164	164	331	331	99	99	298	298
194A	9	167	167	326	326	222	227	245	245	164	164	330	330	98	98	296	296
195A	9	167	167	327	327	222	222	245	245	164	164	331	331	98	98	296	296
196A	9	167	167	327	327	222	222	245	245	164	164	330	330	98	98	296	296
197A	9	168	168	327	327	222	222	245	245	164	164	331	331	99	99	296	296
198A	9	167	167	327	327	222	222	245	245	164	164	334	334	98	98	296	296
199A	9	167	167	327	327	223	223	245	245	164	164	330	330	98	98	298	298
200A	9	167	167	327	327	223	223	245	245	164	164	331	331	98	98	298	298
53A	10	165	165	326	326	224	224	243	243	161	161	332	332	97	97	296	296
54A	10	165	165	326	326	223	223	243	243	161	161	332	332	97	97	296	296
55A	10	165	165	326	326	224	224	243	243	162	162	331	331	97	97	296	296
56A	10	164	164	326	326	221	227	241	241	162	162	332	332	97	97	296	296
57A	10	165	165	326	326	222	227	241	241	161	161	334	334	95	95	296	296
58A	10	165	165	326	326	222	227	241	241	161	161	333	333	97	97	296	296
59A	10	165	165	329	329	223	225	243	243	161	161	334	334	98	98	299	299
60A	10	167	167	330	330	224	227	243	243	163	163	335	335	98	98	299	299
61A	10	165	165	332	332	224	224	243	243	163	163	336	336	98	98	299	299
62A	10	166	166	329	329	220	222	243	243	161	161	334	334	0	0	298	298
63A	10	164	164	327	327	220	222	243	243	161	161	334	334	97	97	298	298
64A	10	164	164	327	327	222	222	243	243	161	161	332	332	97	97	296	296
65A	10	164	164	327	327	222	222	243	243	162	162	333	333	95	95	296	296
66A	10	164	164	326	326	221	224	243	243	162	162	331	331	97	97	296	296
67A	10	164	164	327	327	221	224	243	243	162	162	332	332	97	97	296	296
68A	10	164	164	326	326	221	225	243	243	162	162	332	332	97	97	296	296
69A	10	165	165	327	327	221	226	243	243	162	162	334	334	97	97	296	296
70A	10	164	164	327	327	221	226	243	243	162	162	333	333	97	97	296	296
71A	10	165	165	331	331	223	227	243	243	162	162	333	333	98	98	298	298
72A	10	166	166	332	332	228	228	240	240	163	163	335	335	98	98	299	299
73A	10	165	165	330	330	224	229	240	240	0	0	335	335	98	98	299	299
74A	10	166	166	326	326	223	227	240	240	161	161	334	334	0	0	296	296
219	10	172	172	329	329	223	227	246	246	165	165	332	332	98	98	299	299
220	10	172	172	330	330	227	227	246	246	168	168	332	332	98	98	300	300
221	10	172	172	331	331	228	228	246	246	168	168	334	334	98	98	300	300
222	10	173	173	333	333	225	228	250	250	168	168	335	335	97	97	300	300
223	10	172	172	332	332	228	228	248	248	167	167	332	332	97	97	300	300
224	10	173	173	332	332	224	228	249	249	167	167	332	332	97	97	300	300
225	10	173	173	331	331	224	228	246	246	165	165	331	331	97	97	299	299
226	10	172	172	331	331	223	227	248	248	164	164	331	331	97	97	299	299
227	10	173	173	332	332	223	227	249	249	164	164	330	330	97	97	299	299
228	10	173	173	331	331	222	227	0	0	0	0	331	331	97	97	299	299
229	10	173	173	331	331	224	224	0	0	0	0	330	330	97	97	298	298
230	10	172	172	331	331	224	224	0	0	0	0	330	330	97	97	298	298
231	10	172	172	331	331	223	223	248	248	164	164	332	332	97	97	298	298
232	10	172	172	331	331	223	223	249	249	165	165	331	331	97	97	298	298
11	11	167	167	331	331	226	230	243	243	163	163	335	335	99	99	303	303
12	11	166	166	327	327	225	228	243	243	163	163	332	332	98	98	302	302
13	11	166	166	327	327	224	224	243	243	163	163	332	332	98	98	300	300
14	11	166	166	326	326	224	228	245	245	163	163	331	331	98	98	299	299
15	11	166	166	326	326	224	228	243	243	163	163	331	331	99	99	299	299
16	11	167	167	326	326	225	228	243	243	164	164	332	332	98	98	299	299
17	11	166	166	326	326	223	223	243	243	163	163	331	331	98	98	299	299
18	11	167	167	327	327	224	228	243	243	164	164	331	331	98	98	299	299
19	11	166	166	327	327	223	228	245	245	162	162	331	331	98	98	299	299
20	11	166	166	326	326	224	228	245	245	163	163	332	332	98	98	299	299
21	11	166	166	327	327	225	228	245	245	163	163	332	332	98	98	300	300
22	11	167	167	330	330	226	230	245	245	164	164	335	335	98	98	302	302
23	11	168	168	332	332	227	227	245	245	163	163	331	331	100	100	302	302
24	11	167	167	329	329	226	226	245	245	163	163	331	331	99	99	299	299
1A	12	169	169	330	330	226	226	248	248	168	168	335	335	100	100	303	303
2A	12	169	169	330	330	225	229	248	248	168	168	336	336	100	100	303	303
3A	12	169	169	330	330	223	229	248	248	168	168	334	334	100	100	303	303
4A	12	169	169	330	330	225	225	248	248	168	168	333	333	100	100	303	303
5A	12	169	169	331	331	224	224	246	246	168	168	333	333	100	100	303	303
6A	12	169	169	331	331	224	224	248	248	168	168	332	332	100	100	303	303
7A	12	169	169	332	332	226	230	249	249	168	168	334	334	102	102	303	303
8A	12	171	171	331	331	228	228	250	250	168	168	332	332	102	102	305	305
9A	12	172	172	332	332	230	234	249	249	170	170	333	333	103	103	308	308
97A	13	171	171	331	331	228	228	248	248	168	168	332	332	99	99	302	302
98A	13	171	171	331	331	228	228	249	249	168	168	332	332	100	100	303	303
99A	13	171	171	331	331	229	229	250	250	168	168	333	333	102	102	305	305
100A	13	172	172	331	331	230	230	250	250	170	170	332	332	102	102	308	308
101A	13	172	172	330	330	229	229	248	248	170	170	334	334	103	103	308	308
102A	13	171	171	329	329	226	231	250	250	168	168	334	334	102	102	305	305
103A	13	169	169	330	330	226	230	249	249	168	168	332	332	102	102	303	303
104A	14	161	161	326	326	224	224	240	240	161	161	334	334	95	95	296	296
105A	14	164	164	326	326	222	222	241	241	161	161	332	332	97	97	296	296
106A	14	165	165	326	326	222	222	240	240	161	161	0	0	94	94	296	296
107A	14	162	162	326	326	222	222	240	240	161	161	333	333	95	95	296	296
108A	14	163	163	326	326	222	222	238	241	162	162	333	333	95	95	296	296
109A	14	161	161	326	326	221	222	241	241	161	161	332	332	95	95	296	296
158A	15	172	172	330	330	229	229	249	249	168	168	335	335	102	102	300	300
159A	15	172	172	330	330	228	228	249	249	168	168	0	0	100	100	300	300
160A	15	172	172	330	330	228	228	248	248	168	168	335	335	100	100	300	300
161A	15	173	173	331	331	227	227	250	250	167	167	0	0	100	100	302	302
162A	15	174	174	333	333	227	227	251	251	167	167	0	0	99	99	303	303
163A	15	172	172	332	332	224	228	250	250	165	165	336	336	99	99	303	303
164A	15	172	172	331	331	224	228	249	249	167	167	335	335	100	100	302	302
165A	15	172	172	330	330	228	228	0	0	167	167	334	334	99	99	302	302
166A	15	171	171	329	329	228	228	248	248	167	167	334	334	100	100	300	300
149A	16	172	172	331	331	226	226	249	249	168	168	334	334	99	99	303	303
150A	16	173	173	332	332	226	226	250	250	167	167	336	336	99	99	303	303
151A	16	174	174	332	332	224	226	251	251	168	168	338	338	98	98	303	303
152A	16	173	173	331	331	226	226	249	249	168	168	336	336	98	98	303	303
153A	16	172	172	331	331	226	226	249	249	168	168	336	336	98	98	302	302
154A	16	172	172	330	330	226	226	249	249	168	168	335	335	99	99	300	300
155A	16	172	172	330	330	227	231	249	249	168	168	334	334	99	99	300	300
156A	16	172	172	330	330	227	232	249	249	168	168	334	334	99	99	299	299
157A	16	172	172	330	330	226	226	248	248	168	168	334	334	100	100	300	300
169A	17	171	171	329	329	225	228	248	248	167	167	334	334	100	100	299	299
170A	17	171	171	329	329	229	229	248	248	168	168	334	334	102	102	299	299
171A	17	171	171	329	329	226	231	248	248	168	168	334	334	100	100	299	299
172A	17	171	171	329	329	224	228	248	248	168	168	334	334	100	100	299	299
173A	17	171	171	329	329	224	231	248	248	168	168	335	335	100	100	300	300
174A	17	171	171	331	331	223	229	248	248	167	167	335	335	100	100	300	300
175A	17	172	172	332	332	223	230	250	250	167	167	336	336	99	99	303	303
176A	17	173	173	332	332	224	224	250	250	167	167	336	336	99	99	303	303
177A	17	173	173	331	331	223	229	249	249	167	167	336	336	99	99	302	302
178A	17	172	172	330	330	224	224	249	249	167	167	336	336	99	99	302	302

## Sheet: ISJ
75	345	17	15	23	60	11	5	40	10	62	19	36	14	9	7	6	9	9	10	1	345
binary data			Pop 1	Pop 2	Pop 3	Pop 4	Pop 5	Pop 6	Pop 7	Pop 8	Pop 9	Pop 10	Pop 11	Pop 12	Pop 13	Pop 14	Pop 15	Pop 16	Pop 17
Sample no.	Pop	Locus1	Locus2	Locus3	Locus4	Locus5	Locus6	Locus7	Locus8	Locus9	Locus10	Locus11	Locus12	Locus13	Locus14	Locus15	Locus16	Locus17	Locus18	Locus19	Locus20	Locus21	Locus22	Locus23	Locus24	Locus25	Locus26	Locus27	Locus28	Locus29	Locus30	Locus31	Locus32	Locus33	Locus34	Locus35	Locus36	Locus37	Locus38	Locus39	Locus40	Locus41	Locus42	Locus43	Locus44	Locus45	Locus46	Locus47	Locus48
80	1	0	0	0	0	0	0	0	0	0	1	0	0	0	0	0	1	0	1	0	1	0	0	0	0	0	0	0	0	0	0	1	1	0	1	0	1	0	1	1	0	0	0	0	0	1	0	0	1
82	1	0	0	0	0	0	0	0	0	0	1	0	0	0	0	1	0	0	0	0	1	0	0	0	1	0	0	0	0	1	0	0	0	0	0	0	0	0	1	1	0	0	0	0	0	1	0	1	1
83	1	0	0	0	0	0	0	0	0	0	0	0	0	0	0	0	0	0	0	0	0	0	0	0	0	0	0	0	0	0	0	0	0	0	0	0	0	0	0	0	0	0	0	0	0	0	0	0	0
84	1	0	0	0	0	0	0	0	0	0	1	0	0	0	0	1	0	0	1	0	1	0	0	1	1	0	0	0	0	1	0	0	0	0	1	0	1	0	1	1	0	0	1	0	0	1	0	1	1
85	1	0	0	0	0	0	0	0	0	0	1	0	0	0	0	1	0	0	1	0	1	0	0	0	1	0	0	0	0	1	0	0	1	0	1	0	1	0	1	1	1	0	0	0	0	1	0	1	1
86	1	0	0	0	0	0	0	0	0	0	1	0	0	0	0	1	0	0	1	0	1	0	0	1	0	0	0	0	0	1	0	0	1	0	1	0	1	0	1	1	1	0	0	1	0	1	0	0	1
87	1	0	0	0	0	0	0	0	0	0	0	0	0	0	0	0	1	0	0	0	1	0	1	0	0	0	0	0	0	0	0	0	0	0	1	0	1	0	0	0	0	0	0	0	0	0	0	0	0
88	1	0	0	0	0	0	0	0	0	0	1	0	0	0	0	1	1	0	1	0	1	0	0	1	1	0	0	0	0	1	0	0	1	0	1	0	1	0	1	1	0	0	0	1	0	1	0	1	1
89	1	0	0	0	0	0	0	0	0	0	0	0	0	0	0	0	1	0	1	0	1	0	0	0	0	0	0	0	0	0	0	0	0	0	0	0	1	0	1	0	1	0	0	0	0	0	0	0	0
90	1	0	0	0	0	0	0	0	0	0	1	0	0	0	0	1	1	0	1	0	1	0	0	1	1	0	0	0	0	1	0	0	0	0	0	0	1	0	1	1	1	0	1	0	0	1	0	1	1
91	1	0	0	0	0	0	0	0	0	0	1	0	0	0	0	1	1	0	1	0	1	0	0	1	0	0	0	0	0	0	0	0	1	0	0	0	1	0	0	1	0	0	0	1	0	0	0	1	1
92	1	0	0	0	0	0	0	0	0	0	1	0	0	0	0	1	1	0	1	0	1	0	0	0	0	0	0	0	0	1	0	0	0	0	1	0	1	0	1	1	0	0	1	1	0	1	0	1	1
93	1	0	0	0	0	0	0	0	0	0	0	0	0	1	0	0	0	0	0	0	0	0	0	1	0	0	0	0	0	0	0	0	0	0	0	0	0	0	0	0	0	0	0	0	0	0	0	0	0
94	1	0	0	0	0	0	0	0	0	0	1	0	0	0	0	1	0	0	1	0	1	0	0	0	0	0	0	0	0	0	0	0	0	0	1	0	1	0	1	0	1	1	0	0	0	1	0	1	1
95	1	0	0	0	0	0	0	0	0	0	1	0	0	0	0	1	0	0	1	0	1	0	0	0	0	0	0	0	0	1	0	0	0	0	1	0	0	0	0	1	0	0	1	0	0	1	0	0	1
75A	2	1	1	0	0	0	1	0	0	0	1	0	1	0	0	1	0	0	1	0	0	1	0	0	0	0	0	0	0	1	1	0	1	0	1	0	0	0	1	0	1	0	0	1	0	1	1	1	1
76A	2	1	1	0	0	0	1	0	0	0	1	0	1	0	0	1	0	0	0	0	1	0	1	0	0	0	0	0	0	1	0	1	0	0	1	0	0	0	0	1	1	0	1	0	0	1	0	0	1
77A	2	1	1	0	0	0	1	0	0	0	1	0	1	0	1	0	1	0	0	0	1	1	0	0	0	0	0	0	0	0	1	0	1	0	1	0	0	0	1	0	1	0	0	0	0	1	0	0	1
78A	2	1	1	0	0	0	1	0	0	0	1	0	1	1	0	1	0	0	1	0	0	0	0	0	0	0	0	0	1	1	1	0	0	0	0	0	0	0	1	0	1	0	1	1	0	1	0	0	0
79A	2	1	1	0	0	0	1	0	0	0	1	0	0	0	0	1	1	0	1	0	0	1	0	0	0	0	0	0	0	1	0	0	0	0	1	0	0	0	0	1	1	0	0	0	0	1	1	0	1
80A	2	1	1	0	0	0	1	0	0	0	1	0	1	1	0	1	1	0	1	0	0	1	0	0	0	0	0	0	0	1	1	0	0	0	0	0	0	0	0	1	1	0	0	0	0	1	1	0	0
81A	2	1	1	0	0	0	1	1	0	0	1	1	0	0	1	0	1	0	1	0	0	0	0	0	0	0	0	0	0	1	1	0	0	0	0	0	0	0	1	0	1	0	0	0	0	0	0	0	0
82A	2	1	1	0	0	0	1	0	0	0	1	0	1	0	0	1	1	0	1	0	0	0	1	0	0	0	0	0	0	1	1	0	0	0	1	0	0	0	0	0	1	0	0	0	0	0	0	0	0
83A	2	1	1	0	0	0	1	1	0	0	1	0	0	0	0	1	0	0	1	0	0	0	1	0	0	0	0	0	0	1	1	1	1	0	1	0	0	0	0	1	1	0	1	0	0	1	0	0	1
84A	2	1	1	0	0	0	1	0	0	0	1	0	0	0	0	1	1	0	1	0	0	1	0	0	0	0	0	0	0	1	1	0	1	0	0	0	0	0	1	0	1	0	1	0	0	1	0	0	1
31A	2	1	1	0	0	0	1	1	0	0	1	0	1	0	1	0	1	0	1	0	0	1	0	0	0	0	0	0	0	1	1	0	0	0	1	0	0	0	0	0	1	0	1	0	0	0	0	0	1
32A	2	1	0	0	0	0	1	0	0	0	1	0	1	0	0	1	0	0	1	0	0	1	0	0	0	0	0	0	0	0	1	0	1	0	0	1	0	0	0	0	1	0	0	0	0	1	0	0	1
33A	2	1	1	0	0	0	1	0	0	0	1	0	1	0	0	1	1	0	1	0	0	1	0	0	0	1	0	0	0	1	1	0	0	0	1	1	0	0	0	0	1	0	0	0	0	1	0	0	1
34A	2	1	1	0	0	0	1	0	0	0	1	0	1	1	0	1	1	0	1	0	0	1	0	0	0	0	0	0	0	0	1	0	1	0	1	0	0	0	0	0	1	0	0	0	0	0	0	0	1
35A	2	1	1	0	0	0	1	0	0	0	1	0	1	1	1	0	1	0	1	0	0	0	0	0	0	0	0	0	0	1	1	0	1	0	0	0	0	0	0	0	1	0	0	0	0	0	0	1	0
36A	2	1	1	0	0	0	1	0	0	0	1	0	1	0	0	1	0	0	1	0	1	0	0	0	0	0	0	0	0	1	1	0	0	1	0	0	1	0	1	0	1	0	0	1	0	0	1	0	0
37A	2	1	1	0	0	0	1	0	0	0	1	0	0	0	0	1	1	0	1	0	0	1	1	0	0	0	0	0	0	0	0	0	1	0	1	0	0	0	0	0	1	0	1	0	0	0	0	0	1
38A	2	0	0	0	0	0	0	0	0	0	1	0	0	0	0	1	0	0	1	0	0	1	0	0	0	0	0	0	0	0	1	0	1	0	0	0	1	0	1	0	1	0	0	0	0	0	0	0	0
39A	2	1	1	0	0	0	0	0	0	0	1	0	1	0	0	1	1	0	1	0	0	0	1	0	0	0	0	0	0	0	1	0	1	0	0	0	1	0	0	0	1	0	0	0	0	1	0	0	1
40A	2	1	1	0	0	0	0	0	0	0	1	0	0	1	0	1	1	0	1	0	1	1	0	0	0	0	0	0	1	0	1	0	0	0	1	0	0	0	1	0	1	0	0	0	0	0	0	0	0
41A	2	0	0	0	0	0	0	0	0	0	0	0	0	0	0	0	0	0	0	0	0	0	0	0	0	0	0	0	0	0	0	0	0	0	0	0	0	0	0	0	0	1	0	0	0	0	0	0	0
42A	2	0	0	0	0	0	0	0	0	0	0	0	0	0	0	1	0	0	1	0	0	1	0	0	0	0	0	0	0	0	0	0	0	0	0	0	0	0	0	0	0	0	0	0	0	0	0	0	0
43A	2	0	0	0	0	0	0	0	0	0	0	0	0	0	0	1	0	0	1	0	0	1	0	0	0	0	0	0	0	0	1	0	0	0	0	0	0	0	0	0	1	1	0	0	0	0	0	0	0
171	3	0	0	0	0	0	0	1	0	0	1	0	0	0	0	1	0	0	1	0	0	0	0	1	0	0	0	0	0	0	0	0	1	0	0	0	0	0	0	0	1	0	1	0	0	1	1	0	1
172	3	0	0	0	0	0	0	0	0	0	1	0	0	0	0	1	0	0	1	0	0	0	0	0	1	0	0	0	0	0	0	0	1	0	0	0	0	0	1	0	1	0	0	0	0	1	1	0	1
173	3	0	0	0	0	0	0	0	0	0	1	0	0	0	0	1	0	0	1	0	0	0	0	0	1	0	0	0	0	0	0	0	1	0	0	0	0	0	1	0	1	0	0	0	0	1	1	0	1
174	3	0	0	0	0	0	0	0	0	0	0	0	0	0	0	0	0	0	1	0	0	0	0	0	0	0	0	0	0	0	0	0	0	0	0	0	0	0	0	0	0	0	0	0	0	0	0	0	0
177	3	0	0	0	0	0	0	0	0	0	0	0	0	0	0	0	0	0	1	0	0	0	0	0	0	0	0	0	0	0	0	0	0	0	0	0	0	0	0	0	0	0	0	0	0	0	0	0	0
180	3	0	0	0	0	0	0	0	0	0	0	0	0	0	0	1	0	0	1	0	0	0	0	0	0	0	0	0	0	0	0	0	1	0	0	0	0	0	1	0	1	0	1	0	0	1	0	0	1
181	3	1	1	0	0	0	1	0	0	0	1	0	1	0	0	1	0	0	1	0	0	0	0	0	0	0	0	0	0	1	1	0	1	0	0	0	1	0	0	0	1	0	0	0	0	1	0	0	1
257A	3	1	1	0	0	0	1	0	0	0	1	0	1	0	0	1	0	0	1	0	0	0	0	0	0	0	0	0	0	1	1	0	1	0	0	0	1	0	0	0	1	0	0	0	0	1	0	0	1
258A	3	1	0	0	0	0	1	0	0	0	1	0	0	0	0	1	0	0	1	0	0	0	0	0	0	0	0	0	0	0	0	0	1	0	1	0	0	0	0	0	1	0	0	0	0	1	1	0	1
259A	3	1	1	0	0	0	0	0	0	0	1	0	1	0	0	1	0	0	1	0	0	0	0	0	0	0	0	0	1	0	0	0	1	0	0	0	0	0	0	0	1	0	1	0	0	1	0	0	1
260A	3	0	0	0	0	0	0	0	0	0	0	0	0	0	0	0	0	0	0	0	0	0	0	0	0	0	0	0	0	0	0	0	0	0	0	0	1	0	0	0	1	0	0	0	0	0	0	0	0
193	3	0	0	0	0	0	0	0	0	0	1	0	0	0	0	1	0	0	1	0	0	0	0	1	0	1	1	0	0	0	0	0	1	0	0	0	0	0	0	0	0	0	1	0	0	1	1	0	1
194	3	1	0	0	0	0	0	0	0	0	1	0	0	0	0	1	0	0	0	0	1	1	0	1	0	0	0	0	0	0	0	0	1	0	0	0	1	0	0	0	1	0	0	0	0	1	1	0	1
195	3	1	1	0	0	0	0	1	0	0	1	0	0	0	0	1	0	0	0	0	0	0	0	0	0	1	0	0	1	0	1	0	1	0	0	0	0	0	0	1	1	1	0	0	0	0	0	1	0
196	3	1	0	0	0	0	0	1	0	0	1	0	0	0	0	1	0	0	1	0	0	0	0	1	0	0	0	0	0	0	0	0	1	0	1	0	0	0	1	0	1	0	1	0	0	1	0	1	1
197	3	0	0	0	0	0	0	1	0	0	1	0	0	0	0	1	0	0	1	0	0	0	0	1	0	0	0	0	0	1	0	0	1	0	0	0	0	0	1	0	1	0	1	1	0	1	0	0	1
261A	3	0	0	0	0	0	0	0	0	0	1	0	1	0	0	0	1	0	1	0	0	0	0	0	0	0	0	0	0	1	1	0	1	0	0	0	0	0	1	0	1	0	1	0	0	1	0	0	1
262A	3	1	1	0	0	0	0	1	0	0	1	0	1	0	0	1	0	0	0	0	1	0	0	0	0	0	0	0	0	0	0	0	1	0	1	0	1	0	1	0	1	0	1	0	0	1	0	0	1
263A	3	1	1	0	0	0	0	0	0	0	1	0	1	0	0	1	0	0	0	0	0	0	0	0	0	0	0	0	0	0	0	0	1	0	1	0	1	0	1	0	1	0	1	1	0	1	0	0	1
264A	3	1	0	0	0	0	0	1	0	0	1	0	1	0	0	1	0	0	1	0	0	1	0	0	0	0	0	0	0	1	1	0	1	0	1	0	1	0	1	0	1	0	1	0	0	1	0	0	1
265A	3	1	0	0	0	0	0	1	0	0	1	0	1	0	0	1	0	0	1	0	0	0	0	0	0	0	0	0	0	0	1	0	1	0	0	1	0	0	0	1	1	0	1	0	0	1	0	0	1
266A	3	1	0	0	0	0	0	0	0	0	1	0	1	0	0	1	0	0	1	0	0	1	0	0	0	0	0	0	0	0	1	0	1	0	1	0	0	0	1	1	1	0	1	0	0	1	0	0	1
267A	3	1	0	0	0	0	0	0	0	0	1	0	1	0	0	1	0	0	1	0	0	0	0	0	0	0	0	0	0	0	1	0	1	0	1	0	0	0	1	1	1	0	1	1	0	1	0	0	1
268A	3	1	1	0	0	0	0	0	0	0	1	0	1	0	0	1	0	0	1	0	0	0	0	0	0	0	0	0	0	1	0	0	0	0	1	0	1	0	0	0	1	0	1	0	0	1	0	0	1
269A	3	1	1	0	0	0	0	1	0	0	1	0	1	0	1	0	1	0	0	0	0	0	0	1	0	1	0	0	0	0	1	0	1	0	0	0	0	0	1	1	1	0	1	0	0	1	1	0	1
270A	3	1	0	0	0	0	1	0	0	0	1	0	1	0	0	1	1	0	1	0	0	0	0	0	0	0	0	0	0	0	0	0	1	0	1	0	0	0	0	0	1	0	1	1	0	1	0	0	1
271A	3	1	1	0	0	0	1	0	0	0	1	0	1	0	0	1	0	0	0	0	0	0	0	0	0	0	0	0	0	1	0	0	0	0	0	0	0	0	1	0	1	0	1	1	0	1	1	0	1
272A	3	1	1	0	0	0	1	0	0	0	1	0	1	0	0	1	0	0	1	0	0	0	0	0	0	0	0	0	0	0	0	0	1	0	1	0	0	0	0	0	1	0	1	1	0	1	0	0	1
273A	3	1	0	0	0	0	1	0	0	0	1	0	1	0	0	1	0	0	1	0	0	0	0	0	0	0	0	0	0	0	0	0	1	0	1	0	0	0	0	0	0	0	1	1	0	1	0	0	1
182	3	1	0	0	0	0	1	0	0	0	0	0	0	0	0	0	0	0	0	0	0	0	0	0	0	0	0	0	0	0	0	0	0	0	0	0	0	0	0	0	0	0	0	0	0	0	0	0	0
274A	3	1	1	0	0	0	1	0	0	0	1	0	1	0	0	1	0	0	1	0	0	0	0	0	0	0	0	0	0	0	0	0	1	0	0	0	0	0	1	0	0	0	1	0	0	0	0	1	1
275A	3	1	0	0	0	0	1	0	0	0	1	0	1	0	0	1	0	0	0	0	0	0	0	0	0	0	0	0	0	1	1	0	1	0	0	0	0	0	1	0	1	0	0	1	0	1	0	0	1
276A	3	1	0	0	0	0	1	0	0	0	1	0	1	0	0	1	0	0	1	0	0	0	0	0	0	0	0	0	0	0	0	0	1	0	1	0	0	0	0	0	1	0	1	0	0	1	0	0	1
277A	3	1	0	0	0	0	1	0	0	0	1	0	1	0	0	0	1	0	1	0	0	0	0	0	0	0	0	0	0	0	1	0	0	0	0	0	0	0	0	0	1	1	1	1	0	1	0	0	1
278A	3	1	0	0	0	0	1	0	0	0	1	0	1	0	1	0	1	0	1	0	1	0	0	0	0	0	0	0	0	0	1	0	0	0	0	0	0	0	1	0	1	0	1	0	0	0	0	0	1
279A	3	1	1	0	0	0	1	0	0	0	1	0	1	0	0	1	0	0	0	0	0	0	0	0	0	0	0	0	0	0	0	0	1	0	1	0	0	0	0	0	1	1	0	0	0	1	0	0	1
280A	3	1	0	0	0	0	1	0	0	0	1	0	1	0	0	1	0	0	1	0	0	0	0	0	0	0	0	0	0	0	0	0	1	0	1	0	0	0	0	0	1	0	1	1	0	1	0	1	1
281A	3	1	1	0	0	0	1	0	0	0	1	0	1	1	0	0	1	0	0	0	0	1	0	0	0	0	0	0	0	0	1	0	0	0	0	0	0	0	1	0	0	1	0	0	0	0	0	1	1
282A	3	1	1	0	0	0	1	0	0	0	1	0	1	0	0	1	0	0	1	0	0	1	0	0	0	0	0	0	0	0	0	0	1	0	1	0	0	0	1	0	0	0	0	0	0	1	0	1	1
283A	3	1	0	0	0	0	1	0	0	0	1	0	1	0	0	0	1	0	0	0	0	0	0	0	0	0	0	0	0	0	0	0	0	0	0	0	0	0	0	0	1	0	1	1	0	1	0	1	1
284A	3	0	0	0	0	0	0	0	0	0	1	0	1	0	0	0	1	0	1	0	0	0	0	0	0	0	0	0	0	0	1	0	0	0	0	1	0	0	1	0	0	1	0	0	0	1	0	0	1
198	3	0	0	0	0	0	0	0	0	0	1	0	0	0	1	0	1	0	0	0	1	0	0	1	0	1	0	0	0	0	0	0	0	1	0	1	0	0	0	0	0	0	1	0	0	1	1	0	1
199	3	1	0	0	0	0	0	0	0	0	1	0	0	0	0	1	0	0	1	0	0	0	0	1	0	1	0	0	0	0	0	0	0	1	0	0	0	0	0	0	1	1	0	0	0	1	1	0	1
200	3	0	0	0	0	0	0	0	0	0	1	0	0	0	0	1	0	0	1	0	1	0	0	0	1	0	0	0	0	0	0	0	0	1	0	0	0	0	0	0	0	0	1	0	0	1	0	0	1
201	3	0	0	0	0	0	0	0	0	0	0	0	0	0	0	0	0	0	0	0	0	0	0	0	0	0	0	0	0	0	1	0	0	0	1	0	0	0	1	0	0	1	0	0	1	0	0	0	0
202	3	0	0	0	0	0	0	0	0	0	1	0	0	0	0	1	0	0	1	0	0	1	0	0	0	1	0	0	0	0	0	0	0	0	0	1	0	0	0	0	0	0	1	0	0	1	0	0	1
203	3	1	0	0	0	0	0	0	0	0	1	0	0	0	0	1	1	0	0	0	1	0	0	1	0	0	0	0	0	0	0	0	0	1	0	0	0	0	0	0	1	0	1	0	0	1	1	0	1
204	3	0	0	0	0	0	0	0	0	0	1	0	0	0	0	1	0	0	1	0	0	1	0	1	1	1	0	0	0	0	0	0	0	1	0	1	0	0	1	0	0	0	1	1	0	1	1	0	1
205	3	1	0	0	0	0	0	0	0	0	1	0	0	0	0	1	1	0	1	0	1	0	0	0	0	0	0	0	0	0	0	0	0	0	1	0	0	0	0	0	1	0	0	0	0	1	0	0	1
206	3	0	0	0	0	0	0	0	0	0	1	0	0	0	0	1	1	0	1	0	1	0	0	0	1	0	0	0	0	0	0	0	0	0	1	0	0	0	0	0	1	0	1	1	0	1	1	0	1
207	3	0	0	0	0	0	0	0	0	0	1	0	0	0	0	1	1	0	1	0	1	0	0	0	0	0	0	0	0	0	0	0	0	0	0	0	0	0	0	0	1	0	1	0	0	1	1	0	1
208	3	0	0	0	0	0	0	0	0	0	1	0	0	1	0	0	1	0	1	0	1	0	0	0	1	1	0	0	0	0	0	0	0	0	0	0	0	0	0	0	1	0	0	0	0	1	1	0	1
209	3	0	0	0	0	0	0	0	0	0	1	0	0	0	0	1	0	0	1	0	1	0	0	0	0	0	0	0	0	0	0	0	1	0	1	0	0	0	0	0	1	0	1	0	0	1	1	0	1
210	3	0	0	0	0	0	0	0	0	0	1	0	0	0	0	1	1	0	1	0	1	0	0	0	1	1	0	0	0	0	0	0	0	0	1	0	0	0	0	0	1	0	1	0	0	1	1	0	1
211	3	0	0	0	0	0	0	0	0	0	1	0	0	0	0	1	0	0	1	0	0	0	0	0	1	0	0	0	0	0	0	0	0	0	0	0	0	0	0	0	1	0	1	0	0	1	1	0	1
212	3	0	0	0	0	0	0	0	0	0	1	0	0	0	0	1	0	0	1	0	1	0	0	0	0	0	0	0	0	0	1	0	0	0	0	1	0	0	1	0	0	0	0	1	0	0	1	0	0
213	3	0	0	0	0	0	0	0	0	0	1	0	0	0	0	1	1	0	1	0	0	0	0	0	1	0	0	0	0	0	0	0	0	0	0	0	0	0	0	0	1	0	0	1	0	1	1	0	1
214	3	0	0	0	0	0	0	0	0	0	1	0	0	0	0	1	0	0	1	0	0	0	0	0	0	0	0	0	0	0	0	0	0	0	0	0	0	0	0	0	1	0	1	0	0	1	1	0	1
215	3	0	0	0	0	0	0	0	0	0	1	0	0	0	0	1	1	0	1	0	0	0	0	0	0	0	0	0	0	0	0	0	0	0	0	0	0	0	0	0	1	0	0	0	0	1	1	0	1
216	3	0	0	0	0	0	0	0	0	0	1	0	0	0	0	1	0	0	1	0	0	0	0	0	0	0	0	0	0	0	0	0	1	0	0	0	0	0	0	0	1	0	0	0	0	1	1	0	1
125A	4	0	0	0	0	0	0	0	0	0	0	0	0	0	0	1	0	0	1	0	0	0	0	0	0	0	0	0	0	0	1	0	0	0	0	0	0	0	1	0	1	0	0	1	0	1	0	0	1
126A	4	0	0	0	0	0	1	1	0	0	1	0	1	0	0	1	1	0	1	0	0	0	1	1	0	0	0	0	0	0	0	0	0	0	0	0	0	0	1	0	0	0	1	0	1	1	0	0	1
127A	4	0	0	0	0	0	0	1	0	0	1	0	0	0	0	1	0	0	1	0	0	0	0	1	0	0	0	0	0	0	0	0	0	0	0	0	0	0	1	0	0	0	1	0	1	1	0	0	1
128A	4	0	0	0	0	0	1	1	0	0	1	0	1	0	0	1	0	0	1	0	0	0	1	1	0	0	0	0	0	0	0	0	0	0	0	0	0	0	1	0	0	0	1	0	1	0	0	0	1
129A	4	0	0	0	0	0	0	0	0	0	0	0	0	0	0	1	0	0	1	0	0	0	1	1	0	0	0	0	0	0	0	0	0	0	0	0	0	0	1	0	0	0	1	0	0	1	0	0	0
130A	4	0	0	0	0	0	0	0	0	0	0	0	0	0	0	0	0	0	0	0	0	0	0	0	0	0	0	0	0	0	0	0	0	0	0	0	0	0	0	0	1	0	0	0	0	0	0	0	0
131A	4	0	0	0	0	0	0	0	0	0	1	0	0	0	0	1	0	0	0	0	0	1	0	1	0	0	0	0	0	0	0	0	0	0	0	0	0	0	1	0	1	1	0	1	0	1	0	0	1
133A	4	0	0	0	0	0	1	0	0	0	1	0	1	1	0	1	0	0	1	0	1	0	0	0	0	1	0	0	0	0	1	0	0	0	0	0	0	0	1	0	1	0	0	0	0	1	0	0	1
134A	4	0	0	0	0	0	0	0	0	0	0	0	0	0	0	0	0	0	0	0	0	0	0	0	0	0	0	0	0	0	0	0	0	0	0	0	0	0	0	0	1	1	1	0	0	0	0	0	0
135A	4	0	0	0	0	0	1	0	0	0	1	0	0	0	0	1	0	0	1	0	1	0	0	0	0	0	0	0	0	0	1	0	0	0	0	0	0	0	1	0	0	0	0	0	1	0	0	0	1
136A	4	0	0	0	0	0	1	0	0	0	1	0	1	0	0	1	0	0	1	0	1	0	0	0	0	1	0	0	0	0	0	0	1	0	1	0	0	0	1	0	1	0	1	0	0	0	0	0	1
293A	5	0	1	0	0	1	1	0	1	0	1	0	0	0	1	0	0	0	1	0	0	0	0	0	0	0	0	0	0	0	0	0	0	0	1	0	1	0	1	1	0	0	1	0	0	1	1	0	1
294A	5	0	0	0	1	0	0	0	0	0	1	0	0	0	0	1	1	1	1	0	0	0	0	0	0	0	0	0	0	0	0	0	0	0	0	0	0	0	0	0	0	1	0	0	0	1	0	1	1
145A	5	1	1	0	0	0	1	1	0	0	1	0	1	0	0	1	0	0	1	0	0	0	0	0	0	0	0	0	0	0	0	0	0	0	0	0	0	0	1	1	0	0	0	0	0	1	0	0	1
295A	5	0	0	0	1	0	0	0	0	0	1	0	0	0	0	1	1	1	1	0	0	0	0	0	0	0	0	0	0	0	0	0	0	0	0	0	0	0	0	0	0	1	0	0	0	1	0	1	1
146A	5	1	1	0	0	0	1	1	0	0	1	0	1	0	0	1	0	0	1	0	0	0	0	0	0	0	0	0	0	0	0	0	0	0	0	0	0	0	1	1	0	0	0	0	0	1	0	0	1
96	6	0	0	0	0	0	0	0	0	0	1	0	0	0	1	0	1	0	1	0	1	0	0	1	0	1	0	0	0	0	0	0	1	0	0	0	1	0	0	0	0	0	1	0	0	1	1	0	1
98	6	0	0	0	0	0	0	0	0	0	1	0	0	0	0	1	0	0	1	0	1	0	0	1	0	1	0	0	0	0	0	0	0	0	1	0	0	0	0	0	0	1	0	0	0	1	1	0	1
99	6	0	0	0	0	0	0	0	1	0	1	0	0	0	1	0	1	0	1	0	1	0	0	1	0	0	0	0	0	0	0	0	1	0	1	0	0	0	0	1	0	0	1	0	0	1	1	0	1
103	6	0	0	0	0	0	0	0	1	0	1	0	0	0	0	1	0	0	1	0	0	0	1	1	0	0	0	0	0	0	0	0	0	0	1	0	0	0	0	1	0	0	1	0	0	1	1	0	1
105	6	0	0	0	0	0	0	0	0	0	0	0	0	0	0	0	0	0	1	0	1	0	1	0	0	0	0	0	0	0	0	0	0	0	0	0	0	0	0	0	0	0	0	0	0	0	0	0	0
106	6	0	0	0	0	0	0	0	0	0	0	0	0	0	0	0	0	0	0	0	0	0	0	0	0	0	0	0	0	0	0	0	0	0	1	0	0	0	0	0	0	0	0	0	0	0	0	0	0
107	6	0	0	0	0	0	0	0	1	0	1	0	0	0	0	1	0	0	1	0	0	0	0	1	0	1	0	0	0	1	0	0	1	0	1	0	1	0	0	1	0	0	1	0	0	1	0	0	1
108	6	0	0	0	0	0	0	0	0	0	1	0	0	0	0	1	0	0	1	0	0	0	0	0	0	0	0	0	0	0	0	0	1	0	1	0	0	0	0	1	0	0	1	0	0	1	1	1	1
109	6	1	0	0	0	0	0	0	1	0	1	0	0	0	0	1	0	0	1	0	0	0	0	1	0	1	0	0	0	0	0	0	1	0	1	0	0	0	0	1	0	1	1	0	0	1	1	0	1
111	6	0	0	0	0	0	0	0	0	0	1	0	0	0	1	0	1	0	1	0	1	0	0	1	0	1	0	0	0	0	0	0	1	0	0	0	0	0	0	1	0	0	1	0	0	1	1	1	1
114	6	0	1	0	0	0	0	0	0	1	1	0	0	0	1	0	1	0	1	0	0	0	0	1	0	0	0	0	0	0	0	0	1	0	0	0	0	0	0	1	0	0	1	1	0	1	1	0	1
116	6	0	0	0	0	0	0	0	0	0	1	0	0	0	0	1	0	0	1	0	1	0	0	0	0	0	0	0	0	0	0	0	0	0	1	0	1	0	0	0	0	0	1	0	0	1	1	0	1
118	6	0	0	0	0	0	0	0	1	0	1	0	0	0	0	1	0	0	1	0	0	0	0	0	0	0	0	0	0	0	0	0	0	0	0	0	0	0	0	0	0	0	1	0	0	1	1	0	1
120	6	0	0	0	0	0	0	0	0	0	0	0	0	0	0	1	0	0	1	0	0	0	0	0	0	0	0	0	0	0	0	0	0	0	0	0	0	0	0	0	0	0	1	0	0	0	0	0	0
121	6	0	0	0	0	0	0	0	0	0	0	0	0	0	0	1	0	0	1	0	0	0	0	0	0	0	0	0	0	0	0	0	0	0	0	0	0	0	0	1	0	1	1	1	0	1	1	0	1
124	6	0	0	0	0	0	0	0	1	0	1	0	0	0	0	1	0	0	1	0	1	0	0	1	0	0	0	0	0	0	0	0	1	0	0	0	0	0	0	1	0	0	0	1	0	1	1	0	1
126	6	0	0	0	0	0	0	0	0	0	1	0	0	0	0	1	0	0	1	0	0	0	0	1	0	0	0	0	0	0	0	0	0	0	1	0	0	0	0	1	0	0	0	1	0	1	1	0	1
128	6	0	0	0	0	0	0	0	0	0	1	0	0	0	0	1	0	0	1	0	1	0	0	0	0	0	0	0	0	1	0	0	0	0	1	0	0	0	0	1	0	0	1	0	0	1	1	1	1
130	6	0	0	0	0	0	0	0	0	0	1	0	0	0	0	1	0	1	1	0	1	0	0	0	0	0	0	0	0	1	0	0	1	0	1	0	0	1	0	1	0	0	1	1	0	1	1	0	1
131	6	0	0	0	0	0	0	0	0	1	1	0	0	0	0	1	0	0	1	0	0	0	0	0	0	0	0	0	0	1	0	0	1	0	0	0	0	1	0	1	0	0	1	0	0	1	1	1	1
133	6	0	0	0	0	0	0	0	0	0	1	0	0	0	0	1	0	1	1	0	0	0	0	0	0	0	0	0	0	0	0	0	0	0	1	0	0	0	0	1	0	0	1	0	0	1	1	0	1
136	6	0	0	0	0	0	0	0	0	1	1	0	0	0	0	1	0	0	1	0	1	0	0	0	0	0	0	0	0	0	0	0	1	0	1	0	0	0	1	1	0	0	1	1	0	1	1	0	1
138	6	0	0	0	0	0	0	0	0	1	1	0	0	0	1	0	0	1	1	0	0	0	1	0	0	1	0	0	0	0	0	0	1	0	1	0	0	0	0	1	0	0	1	1	0	1	0	1	1
140	6	0	0	0	0	0	0	0	0	1	1	0	0	0	1	0	0	0	1	0	0	0	0	1	0	1	0	0	0	0	0	0	0	0	1	0	0	0	0	1	0	0	1	1	0	1	1	0	1
142	6	0	0	0	0	0	0	0	0	0	1	0	0	1	0	1	1	0	1	1	0	0	0	1	0	1	0	0	0	0	0	0	1	0	1	0	0	0	0	1	0	0	0	1	0	1	1	0	1
143	6	0	0	0	0	0	0	0	0	0	1	0	0	0	0	1	1	0	1	0	0	0	0	1	0	1	1	1	0	0	0	0	0	0	1	0	0	0	0	1	0	0	0	1	0	1	1	0	1
144	6	0	0	0	0	0	0	0	0	0	1	0	0	0	1	0	1	0	1	0	0	0	0	1	0	1	0	0	0	1	0	0	1	0	0	0	0	0	0	1	0	0	0	0	0	1	1	0	1
149	6	0	0	0	0	0	0	0	0	0	1	0	0	0	0	1	0	0	1	0	1	0	0	0	0	0	0	0	0	1	0	0	1	0	1	0	0	0	0	1	0	0	1	0	0	1	1	0	1
150	6	0	0	0	0	0	0	0	0	0	1	0	0	0	0	1	0	0	1	0	0	0	0	1	0	1	0	0	0	1	0	0	1	0	1	0	0	0	0	1	0	0	1	0	0	1	1	0	1
152	6	0	0	0	0	0	0	0	0	0	1	0	0	0	0	1	1	0	1	0	1	0	0	1	0	0	0	0	0	1	0	0	0	0	1	0	0	0	0	1	0	0	1	1	0	1	1	0	1
154	6	0	0	0	0	0	0	0	0	0	1	0	0	0	0	1	0	0	1	0	1	0	1	0	0	1	0	0	0	1	0	0	1	0	1	0	0	0	0	1	0	0	0	0	0	1	0	0	1
156	6	0	0	0	0	0	0	0	1	0	1	1	0	0	0	1	0	0	1	0	0	0	0	1	0	1	0	0	0	1	0	0	0	0	0	0	0	0	0	1	0	0	1	1	0	1	1	0	1
158	6	0	0	0	0	0	0	0	1	0	1	0	0	0	0	1	1	0	1	0	0	0	0	1	0	0	0	0	0	0	0	0	1	0	1	0	0	0	0	1	0	0	0	0	0	1	1	0	1
160	6	0	0	0	0	0	0	0	1	0	1	0	0	0	1	0	0	0	1	0	0	0	0	1	0	1	0	0	0	0	0	0	1	0	0	0	0	0	0	1	0	0	1	1	0	1	0	1	1
163	6	0	0	0	0	0	0	0	1	0	1	0	0	0	1	0	0	0	1	0	0	0	0	1	0	0	0	0	0	1	0	0	1	0	1	0	0	0	0	1	0	0	1	0	0	1	1	1	1
166	6	0	0	0	0	0	0	0	0	0	1	0	0	0	0	1	1	1	1	0	0	0	0	1	0	0	0	0	0	1	0	0	0	0	1	0	0	0	0	1	0	0	1	0	0	1	1	0	1
167	6	0	0	0	0	0	0	0	0	0	1	0	1	0	0	1	0	0	1	0	1	0	0	1	0	0	0	0	0	0	0	0	1	0	1	0	0	0	0	1	0	0	1	0	0	1	0	0	1
168	6	0	0	0	0	0	0	0	0	0	1	0	0	0	0	1	0	0	1	0	0	0	0	1	0	1	0	1	0	0	0	0	0	0	1	0	0	0	0	1	0	0	1	0	0	1	0	1	1
169	6	0	0	0	0	0	0	0	0	0	1	0	0	0	0	1	0	0	1	0	0	0	0	1	0	1	0	0	0	1	0	0	1	0	1	0	0	0	0	1	0	0	1	1	0	1	0	1	1
170	6	1	1	0	0	0	0	0	1	0	0	0	0	0	0	0	1	1	1	0	0	0	0	0	0	0	0	0	0	1	0	0	1	0	1	0	0	0	0	1	0	1	0	0	0	0	0	0	0
183	7	0	0	0	0	0	0	0	1	0	1	0	0	0	0	1	0	0	1	0	0	0	0	1	0	0	0	0	0	0	0	0	1	0	1	0	0	0	0	1	0	0	1	1	0	1	0	1	1
184	7	0	0	0	0	0	0	0	0	1	1	0	0	0	0	1	0	0	1	0	0	0	0	1	0	1	0	0	0	0	0	0	0	0	1	0	1	0	0	1	0	0	1	1	0	1	0	1	1
185	7	0	0	0	0	0	0	0	0	0	1	0	0	0	0	1	0	0	1	0	0	0	0	1	0	0	0	0	0	0	0	0	0	0	0	0	0	0	0	1	0	0	1	0	0	1	0	1	1
186	7	0	0	0	0	0	0	0	0	0	1	0	0	0	0	1	0	0	1	0	0	0	0	0	1	1	1	0	0	0	0	0	0	0	0	0	0	0	0	1	0	0	0	0	0	1	0	1	1
187	7	0	0	0	0	0	0	0	0	0	1	0	0	0	1	0	0	0	1	0	0	0	0	0	1	1	1	0	0	0	0	0	0	0	0	0	0	0	0	1	0	0	0	0	0	1	0	1	1
188	7	0	0	0	0	0	0	0	0	0	1	0	0	0	0	1	0	0	1	0	0	0	0	1	1	0	0	1	0	0	0	0	1	0	1	0	0	0	0	1	0	0	1	0	0	1	0	1	1
189	7	0	0	0	0	0	0	0	0	0	1	0	0	0	0	1	0	0	1	0	0	0	0	1	0	0	0	1	0	0	0	0	0	0	0	0	0	0	0	1	0	0	1	0	0	1	0	1	1
190	7	0	0	0	1	0	0	0	0	0	1	0	1	0	0	1	0	0	1	0	1	0	1	1	0	1	0	0	0	0	0	0	0	0	1	0	0	0	0	1	0	0	1	0	0	1	0	1	1
191	7	0	0	0	0	0	0	0	0	0	1	0	0	0	0	1	0	0	1	0	1	0	0	1	0	0	0	1	0	0	0	0	0	0	0	0	0	0	0	1	0	0	0	0	0	1	0	0	1
192	7	0	0	0	0	1	0	0	0	0	1	0	0	0	0	1	1	0	1	0	0	0	0	1	0	1	0	0	0	0	0	0	1	0	0	0	0	1	0	1	0	0	1	0	0	1	1	0	1
17A	8	0	1	0	0	0	1	0	0	0	1	0	1	0	0	1	0	0	1	0	0	0	0	0	0	0	0	0	0	1	0	0	0	0	1	0	0	0	0	1	0	0	0	0	0	1	1	0	1
18A	8	0	0	0	0	0	0	0	0	0	0	0	0	0	0	0	0	0	0	0	0	0	0	0	0	0	0	0	0	0	0	0	0	0	0	0	0	0	0	0	0	0	0	0	0	0	0	0	0
19A	8	0	0	0	0	0	0	0	0	0	0	0	0	0	0	0	0	0	0	0	0	0	0	0	0	0	0	0	0	0	0	0	0	0	0	0	0	0	0	0	0	0	0	0	0	0	0	0	0
20A	8	1	0	0	0	0	0	0	0	0	1	1	0	0	0	1	0	0	1	0	0	0	0	1	0	0	0	0	0	0	0	0	1	0	1	0	0	0	0	1	1	1	0	1	0	1	1	0	1
233A	8	1	0	0	0	0	1	0	0	0	1	0	0	1	0	1	0	0	1	0	1	0	0	0	0	0	0	0	0	0	0	0	0	0	1	0	0	0	0	1	0	0	1	0	0	1	0	0	1
234A	8	0	0	0	0	0	0	0	0	0	0	0	0	0	0	1	0	0	1	0	0	0	0	0	0	0	0	0	0	0	0	0	0	0	0	0	0	0	1	1	0	1	1	0	0	1	0	0	0
235A	8	1	1	0	0	0	0	0	0	0	1	0	0	0	0	1	0	0	1	0	0	0	0	0	0	0	0	0	0	0	0	0	1	0	1	0	0	0	0	1	0	0	1	0	0	1	0	0	1
236A	8	1	0	0	0	0	0	0	0	0	1	0	1	0	0	1	0	0	1	0	0	0	0	0	0	0	0	0	0	0	0	1	0	0	1	0	0	0	1	1	1	1	0	0	0	0	0	1	0
237A	8	0	0	0	0	0	0	1	0	0	1	0	1	0	0	1	1	0	1	0	0	0	0	0	0	0	0	0	0	0	0	0	0	0	1	0	0	0	1	1	0	0	0	1	0	1	1	0	1
238A	8	1	1	0	0	0	1	0	0	0	1	0	1	0	0	1	0	0	1	0	0	0	0	0	0	0	0	0	0	0	0	0	1	0	1	0	0	0	0	1	0	0	1	1	0	1	0	0	1
239A	8	0	0	0	0	0	1	0	0	0	1	0	0	1	0	1	0	0	1	0	0	0	0	0	0	0	0	0	0	0	0	0	0	0	0	0	0	0	0	1	0	0	0	1	0	0	1	0	0
240A	8	1	0	0	0	0	0	0	0	0	1	0	1	0	0	1	0	0	1	0	1	0	0	0	0	0	0	0	0	0	0	1	1	0	0	0	0	0	1	1	1	0	0	1	0	1	0	0	1
241A	8	1	1	0	0	0	1	0	0	0	1	0	1	0	0	1	1	0	1	0	1	0	0	0	0	0	0	0	0	0	0	0	1	0	1	0	0	0	0	1	0	1	0	0	1	1	1	0	1
242A	8	1	0	0	0	0	1	0	0	0	1	1	1	0	0	1	0	0	1	0	0	0	0	0	0	0	0	0	0	0	0	0	1	0	1	0	0	0	1	1	0	1	0	1	0	1	1	0	1
14A	8	0	0	0	0	0	0	0	0	0	1	0	0	0	0	1	0	0	1	0	0	0	0	0	0	0	0	0	0	0	0	0	1	0	0	1	0	0	1	1	1	0	1	0	0	1	1	0	1
15A	8	0	0	0	0	0	0	0	0	0	1	1	0	0	0	1	0	0	1	0	1	0	0	1	0	0	0	0	0	0	0	0	1	0	1	0	0	0	0	1	0	0	0	1	0	1	1	0	1
16A	8	0	0	0	0	0	0	0	0	0	0	0	0	0	0	0	0	0	0	0	0	0	0	0	0	0	0	0	0	0	0	0	0	0	0	0	0	0	0	0	0	0	0	0	0	0	0	0	0
243A	8	1	1	0	0	0	1	0	0	0	1	0	1	0	0	1	0	0	1	0	0	0	0	1	0	0	0	0	0	0	0	0	1	0	0	1	0	0	0	1	0	0	0	0	0	1	1	0	1
244A	8	1	0	0	0	0	1	0	0	0	1	0	1	0	0	1	0	0	1	0	0	0	1	1	0	0	0	0	0	0	0	0	1	0	1	0	0	0	0	1	0	0	0	0	0	1	1	0	1
245A	8	1	0	0	0	0	1	0	0	0	1	0	1	0	0	1	0	0	1	0	1	0	0	0	0	0	0	0	0	0	0	0	1	0	1	0	0	0	1	1	0	0	0	0	0	1	1	0	1
246A	8	1	0	0	0	0	0	0	0	0	1	0	1	0	0	1	0	0	1	0	0	0	0	1	0	0	0	0	0	0	0	0	1	0	1	0	0	0	1	1	0	0	1	0	0	1	1	0	1
247A	8	1	1	0	0	0	1	0	0	0	1	0	0	0	0	1	0	0	1	0	1	0	1	1	0	0	0	0	0	0	0	0	1	0	1	0	0	0	0	1	0	0	1	0	0	1	0	1	1
248A	8	1	1	0	0	0	1	0	0	0	1	0	1	0	0	1	0	0	1	0	0	0	0	0	0	0	0	0	0	1	0	0	1	0	1	0	0	0	0	1	0	0	0	0	0	1	1	1	1
249A	8	1	1	0	0	0	1	0	0	0	1	0	0	0	0	1	0	0	1	0	0	0	0	0	0	0	0	0	0	0	0	0	1	0	0	1	0	0	0	1	0	0	1	0	0	1	1	0	1
250A	8	1	0	0	0	0	0	0	0	0	1	0	1	0	0	1	0	0	1	0	0	0	0	0	0	0	0	0	0	0	0	1	0	0	1	0	0	0	0	1	1	0	0	0	0	1	0	0	1
251A	8	1	0	0	0	0	1	0	0	0	1	0	0	0	0	1	0	0	1	0	0	0	0	1	0	0	0	0	0	0	0	0	1	0	1	1	0	0	0	1	1	0	1	0	1	1	1	0	1
252A	8	1	1	0	0	0	1	0	0	0	1	0	1	0	0	1	0	0	1	0	0	0	0	0	0	0	0	0	0	0	0	0	1	0	1	0	0	0	0	1	0	0	1	1	0	1	1	0	1
214A	8	1	0	0	0	0	1	0	0	0	1	0	1	1	0	1	0	0	1	0	0	0	0	0	0	0	0	0	0	0	0	0	0	0	1	0	0	0	0	0	1	0	1	0	0	1	1	0	1
215A	8	1	0	0	0	0	1	0	0	0	1	0	0	0	0	1	0	0	1	0	0	0	0	1	0	0	0	0	0	0	0	0	0	0	1	0	0	0	0	1	0	0	1	0	0	1	1	0	1
22A	8	1	1	0	0	0	1	0	0	0	1	1	1	0	0	0	1	0	1	0	0	0	0	0	0	0	0	0	1	0	0	0	1	0	1	0	0	0	0	1	0	1	1	0	0	1	0	0	1
23A	8	1	0	0	0	0	0	1	0	0	1	0	1	0	0	1	0	0	1	0	0	0	0	1	0	0	0	0	0	1	0	0	1	0	0	0	0	0	0	1	0	0	0	1	1	1	1	0	1
24A	8	1	0	0	0	0	1	0	0	0	1	0	0	0	0	1	1	0	1	0	0	0	0	1	0	0	0	0	0	0	0	0	1	0	1	0	0	0	0	1	0	0	1	0	0	1	1	0	1
201A	8	1	0	0	0	0	1	0	0	0	1	0	1	0	0	1	0	0	1	0	0	0	0	1	0	0	0	0	0	0	0	0	1	0	1	0	0	0	0	1	0	0	1	0	0	1	1	0	1
202A	8	1	0	0	0	0	1	0	0	0	1	0	1	0	0	1	0	0	1	0	0	0	0	0	0	0	0	0	0	0	0	0	1	0	0	1	0	0	0	1	0	0	0	0	0	1	1	0	1
203A	8	1	1	0	0	0	1	0	0	0	1	0	1	0	0	1	0	0	1	0	1	0	0	0	0	0	0	0	0	0	0	0	1	0	1	1	0	0	1	1	0	0	1	0	0	0	0	0	1
204A	8	1	1	0	0	0	1	0	0	0	1	0	1	0	0	1	1	0	1	0	1	0	0	0	0	0	0	0	0	0	0	0	1	0	1	0	0	0	0	1	0	0	0	0	0	1	1	0	1
205A	8	1	0	0	0	0	0	0	0	0	1	0	0	0	0	1	0	0	1	0	0	0	0	1	0	0	0	0	0	0	0	0	1	0	1	0	0	0	0	1	0	1	0	0	0	1	1	0	1
206A	8	1	0	0	0	0	0	0	0	0	1	0	0	1	0	1	1	0	1	0	0	0	1	0	0	0	0	0	0	0	0	0	0	0	1	0	0	0	1	1	1	0	1	0	0	1	0	0	1
207A	8	1	1	0	0	0	1	0	0	0	1	1	1	0	0	1	1	0	1	0	0	0	0	0	0	0	0	0	0	0	0	0	1	0	1	0	0	0	0	1	0	0	1	0	0	1	1	0	1
208A	8	1	0	0	0	0	1	0	0	0	1	0	0	0	0	1	0	0	1	0	0	0	0	0	0	0	0	0	0	0	0	0	1	0	0	0	0	0	1	1	0	0	1	0	0	1	1	0	1
209A	8	1	0	0	0	0	1	0	0	0	1	0	1	0	0	1	0	0	1	0	1	0	0	0	0	0	0	0	0	0	0	0	1	0	1	0	0	0	0	1	0	0	1	0	0	1	1	0	1
210A	8	1	0	0	0	0	1	0	0	0	1	1	1	0	0	1	1	0	1	0	0	0	0	1	0	0	0	0	0	0	0	0	1	0	1	0	0	0	1	0	1	0	1	0	0	1	0	0	1
211A	8	1	1	0	0	0	1	0	0	0	1	1	0	0	0	1	0	0	1	0	0	0	0	0	0	0	0	0	0	0	0	0	1	0	1	0	0	0	0	0	1	0	0	0	0	1	0	0	1
212A	8	1	0	0	0	0	1	0	0	0	1	0	1	0	0	1	1	0	1	0	1	0	0	0	0	0	0	0	0	0	0	0	1	0	0	0	0	0	1	0	1	0	1	0	0	1	1	0	1
213A	8	1	1	0	0	0	0	0	0	0	1	0	0	0	0	1	0	0	1	0	0	0	1	1	0	0	0	0	0	0	0	0	1	0	1	1	0	0	1	1	0	0	0	0	0	1	1	0	1
216A	8	1	1	0	0	0	1	0	0	0	1	0	0	0	0	1	0	0	1	0	0	0	0	1	0	0	0	0	0	0	0	0	1	0	1	0	0	0	0	1	0	0	0	0	0	1	1	1	1
217A	8	1	1	0	0	0	1	0	0	0	1	0	1	0	0	1	0	0	1	0	1	0	0	0	0	0	0	0	0	0	0	0	1	0	1	0	0	0	0	1	0	0	1	0	0	1	0	0	1
218A	8	1	1	0	0	0	1	0	0	0	1	0	0	0	0	1	0	0	1	0	0	0	0	0	0	0	0	0	0	0	0	0	0	1	0	0	0	0	1	1	0	0	1	0	0	1	0	0	1
219A	8	1	1	0	0	0	1	0	0	0	1	0	1	0	0	1	0	0	1	0	1	0	0	1	0	0	0	0	0	0	0	0	0	0	1	0	0	0	0	1	0	0	1	0	0	1	0	0	1
220A	8	1	1	0	0	0	1	0	0	0	1	0	0	1	0	1	0	0	1	0	1	0	0	1	0	0	0	0	0	0	0	0	0	0	1	0	0	0	0	1	0	0	1	0	0	1	0	1	1
221A	8	1	1	0	0	0	1	0	0	0	1	0	0	0	0	1	0	0	1	0	0	0	0	1	0	0	0	0	0	0	0	0	1	0	1	0	0	0	0	1	0	0	1	0	0	1	0	0	1
222A	8	1	1	0	0	0	1	0	0	0	1	0	1	0	0	1	1	0	1	0	1	0	0	0	0	0	0	0	0	0	0	0	1	0	1	0	0	0	1	1	0	0	1	0	0	1	0	0	1
223A	8	1	1	0	0	0	0	0	0	0	1	0	0	0	0	1	0	0	1	0	0	0	0	1	0	0	0	0	0	0	0	0	1	0	1	0	0	0	0	1	0	0	1	0	0	1	0	0	1
224A	8	1	1	0	0	0	1	0	0	0	1	0	1	0	0	1	1	0	1	0	0	0	0	0	0	0	0	0	0	0	0	0	1	0	1	0	0	0	0	1	0	0	1	0	0	1	0	0	1
225A	8	1	1	0	0	0	0	0	0	0	1	0	1	1	0	1	0	0	1	0	0	0	0	0	0	0	0	0	0	0	0	0	1	0	1	0	0	0	1	1	0	0	0	0	1	0	0	0	1
226A	8	1	1	0	0	0	1	0	0	0	1	0	0	1	0	1	0	0	1	0	1	0	0	1	0	0	0	0	0	0	0	0	1	0	1	0	0	0	1	1	0	0	1	0	0	1	1	0	1
227A	8	1	0	0	0	0	0	0	0	0	1	0	0	0	0	1	0	0	1	0	0	0	0	1	0	0	0	0	0	0	0	0	0	0	1	0	0	0	1	1	0	0	1	0	0	1	1	0	1
228A	8	1	1	0	0	0	1	0	0	0	1	0	0	0	0	1	0	0	1	0	0	0	0	0	0	0	0	0	0	0	0	0	1	0	0	0	0	0	1	1	0	1	0	0	0	1	1	0	1
229A	8	0	1	0	0	0	0	0	0	0	1	0	0	0	0	1	0	0	1	0	1	0	0	0	0	0	0	0	0	0	0	0	1	0	1	0	0	0	1	1	0	0	1	0	0	1	0	0	0
230A	8	1	1	0	0	0	1	0	0	0	1	0	0	0	0	1	0	0	1	0	1	0	0	0	0	0	0	0	0	0	0	0	0	0	1	1	0	0	0	1	0	0	1	0	0	1	1	0	1
231A	8	1	0	0	0	0	0	0	0	0	1	0	1	0	0	1	0	0	1	0	1	0	0	0	0	0	0	0	0	1	0	0	1	0	0	0	0	0	0	1	0	0	1	0	0	1	0	0	1
232A	8	1	1	0	0	0	1	0	0	0	1	0	1	0	0	1	0	0	1	0	1	0	0	0	0	0	0	0	0	1	0	0	1	0	1	0	0	0	1	1	0	0	0	1	0	1	0	0	1
137A	9	0	0	0	0	0	0	0	0	0	0	0	0	0	0	0	0	0	0	0	0	0	0	0	0	0	0	0	0	0	0	0	0	0	0	0	0	0	0	0	0	0	0	0	0	0	1	0	0
138A	9	1	0	0	0	0	1	0	0	0	1	0	1	0	0	1	0	0	1	0	0	0	1	0	0	0	0	0	0	0	0	0	1	0	1	1	0	0	0	0	1	0	1	0	1	1	1	0	1
139A	9	1	0	0	0	0	1	0	0	0	1	0	0	0	0	1	0	0	1	0	0	0	0	0	0	0	0	0	0	0	0	0	1	0	1	0	0	0	1	1	0	0	0	0	0	1	0	0	1
140A	9	1	0	0	0	0	1	0	0	0	1	0	1	0	0	1	0	0	1	0	1	0	0	0	0	0	0	0	0	0	0	0	1	0	0	0	0	0	0	0	1	0	0	0	0	1	1	0	1
141A	9	1	0	0	0	0	0	0	0	0	1	0	1	1	0	1	0	0	1	0	1	0	1	1	0	0	0	0	0	0	0	0	1	0	1	0	0	0	0	1	0	0	1	0	0	1	1	0	1
142A	9	1	0	0	0	0	0	0	0	0	1	0	0	0	0	1	0	0	1	0	0	0	0	0	0	0	0	0	0	0	0	0	1	0	1	0	0	0	0	1	0	0	1	1	0	1	1	0	1
143A	9	1	0	0	0	0	1	0	0	0	1	0	1	0	0	1	0	0	1	0	0	0	0	1	0	0	0	0	0	0	0	0	0	0	1	0	0	0	0	0	1	0	0	0	0	1	1	0	1
144A	9	0	0	0	0	0	1	0	0	0	1	0	1	0	0	0	1	0	1	0	1	0	0	0	0	0	0	0	0	0	0	0	0	1	1	0	0	0	0	1	1	0	0	1	0	0	1	0	1
190A	9	1	0	0	0	0	1	0	0	0	1	0	0	1	0	1	0	0	1	0	0	0	0	0	0	0	0	0	0	0	0	0	1	0	1	0	0	0	1	1	0	0	0	0	0	1	1	0	1
191A	9	1	0	0	0	0	0	0	0	0	1	0	0	0	0	1	0	0	1	0	1	0	1	0	0	0	0	0	0	0	0	0	0	0	1	0	0	0	0	1	0	1	0	0	0	1	0	0	1
192A	9	1	0	0	0	0	0	0	0	0	1	0	0	0	0	1	1	0	1	0	1	0	0	0	0	0	0	0	0	0	0	0	1	0	1	0	1	0	0	1	0	0	1	1	0	0	1	0	1
193A	9	1	0	0	0	0	0	0	0	0	0	0	0	0	0	0	0	0	1	0	1	0	0	0	0	0	0	0	0	0	0	0	0	1	0	0	0	0	0	1	0	0	0	1	0	0	0	0	0
194A	9	1	0	0	0	0	0	0	0	0	1	0	1	0	0	1	0	0	1	0	1	0	1	0	0	0	0	0	0	0	0	0	1	0	1	0	0	0	0	1	1	0	1	1	0	1	0	0	1
195A	9	1	0	0	0	0	0	0	0	0	1	0	1	0	0	1	0	0	1	0	0	0	1	0	0	0	0	0	0	0	0	0	1	0	1	0	1	0	0	1	0	0	1	0	0	1	1	0	1
196A	9	1	1	0	0	0	1	0	0	0	1	0	0	0	0	0	1	0	1	0	0	0	0	0	0	0	0	0	0	0	0	0	0	0	0	0	1	0	1	0	1	0	1	0	0	1	1	0	1
197A	9	1	1	0	0	0	1	0	0	0	1	0	0	0	0	1	1	0	1	0	0	0	0	0	0	0	0	0	0	0	0	0	1	0	1	0	0	0	1	1	0	0	1	0	0	1	0	0	1
198A	9	1	1	0	0	0	1	0	0	0	1	0	0	0	0	1	1	0	1	0	0	0	1	0	0	0	0	0	0	0	0	0	1	0	1	0	0	0	0	1	1	0	0	0	1	1	1	1	1
199A	9	1	1	0	0	0	1	0	0	0	1	0	0	0	0	1	1	0	1	0	0	0	0	0	1	0	0	0	0	0	0	0	1	0	1	0	1	0	0	1	0	0	1	0	0	1	0	1	1
200A	9	1	1	0	0	0	1	0	0	0	1	0	0	0	0	1	0	0	1	0	0	0	0	0	0	0	0	0	0	0	0	0	1	0	0	0	1	0	0	0	1	0	1	0	0	1	0	1	1
53A	10	1	1	0	1	1	1	0	0	0	1	0	1	0	0	1	0	0	1	0	1	0	0	0	0	0	0	0	0	0	0	0	0	0	1	0	0	0	0	1	0	0	0	0	0	0	0	0	1
54A	10	1	1	0	1	1	1	1	0	0	1	0	1	0	0	1	0	0	1	0	1	0	0	0	0	0	0	0	0	0	0	0	0	0	1	0	0	0	1	1	0	0	1	0	0	1	1	0	1
55A	10	1	0	0	1	0	1	1	0	0	1	0	1	0	0	1	0	0	1	0	1	0	0	0	0	0	0	0	0	0	0	0	0	0	1	0	0	1	0	1	0	0	1	0	0	1	0	0	1
56A	10	1	1	1	0	0	1	0	0	0	1	0	1	1	0	1	0	0	1	0	0	0	0	0	0	0	0	0	0	1	0	0	0	0	1	0	0	0	1	1	0	1	1	0	0	1	0	0	0
57A	10	1	1	1	1	0	1	0	0	0	1	0	1	1	0	1	1	0	1	0	0	0	0	0	0	0	0	0	0	1	0	0	0	0	1	0	0	0	0	1	0	0	1	0	0	1	0	0	1
58A	10	1	1	1	0	0	1	0	0	0	1	0	1	1	0	1	1	0	1	0	0	0	0	0	0	0	0	0	0	1	0	0	0	0	1	0	0	0	0	1	0	0	1	0	0	1	0	0	0
59A	10	1	1	1	1	1	1	0	0	0	1	0	1	1	0	1	1	0	1	0	0	0	0	0	0	0	0	0	0	0	0	0	1	0	0	0	1	1	1	1	0	1	1	0	0	1	0	0	0
60A	10	1	1	1	1	1	1	0	0	0	1	1	0	0	0	1	1	0	1	0	0	0	0	0	0	0	0	0	0	0	0	0	1	0	0	0	0	0	1	1	0	0	1	1	0	0	0	0	0
61A	10	1	1	0	0	1	1	1	0	0	1	0	1	0	0	1	1	0	1	0	0	0	0	0	0	0	0	0	0	0	0	0	1	0	1	0	0	1	0	1	0	0	1	0	0	0	0	0	1
62A	10	0	1	0	0	0	1	0	0	0	1	0	1	0	0	1	1	0	1	0	0	0	0	0	0	0	0	0	0	0	0	0	1	0	1	0	1	0	0	1	0	0	1	0	0	1	0	1	1
63A	10	1	1	1	0	0	1	0	0	0	1	1	1	0	0	1	0	0	1	0	0	0	0	0	0	0	0	0	0	0	0	0	1	0	1	0	1	1	1	1	0	0	1	0	0	1	0	1	1
64A	10	1	1	1	0	0	1	0	1	0	1	0	1	0	0	1	0	0	1	0	1	0	0	0	0	0	0	0	0	0	0	0	0	0	1	0	0	0	1	1	0	0	1	1	0	1	0	0	1
65A	10	1	1	0	0	1	1	0	1	0	1	0	1	0	0	1	0	0	1	0	1	0	0	0	0	0	0	0	0	0	0	0	0	0	1	0	1	1	1	1	0	0	1	1	0	1	0	0	1
66A	10	0	0	0	0	0	0	0	0	0	1	0	0	0	0	1	0	0	1	0	0	0	0	1	0	1	0	0	0	0	0	0	1	0	0	0	1	0	0	1	0	0	1	1	0	1	0	1	1
67A	10	1	1	1	1	0	1	0	0	0	1	1	1	0	0	1	1	0	1	0	0	0	0	0	0	0	0	0	0	1	0	0	1	0	0	0	1	1	0	1	0	0	0	1	0	1	0	0	1
68A	10	1	1	1	1	0	0	0	1	0	1	0	1	0	0	1	0	0	1	0	0	0	0	0	0	0	0	0	0	1	0	0	1	0	0	0	1	0	1	1	0	0	0	0	0	1	0	0	0
69A	10	0	1	1	1	1	1	0	1	0	1	1	1	0	0	1	0	0	1	0	0	0	0	0	0	0	0	0	0	1	0	0	1	0	0	0	1	0	0	1	0	0	0	0	0	1	0	0	0
70A	10	1	0	1	0	0	1	0	0	0	1	0	1	1	0	0	1	0	1	0	0	0	0	1	0	0	0	0	0	1	0	0	1	0	1	0	1	0	0	1	0	0	1	0	0	0	0	0	0
71A	10	0	0	0	0	0	0	0	0	0	1	0	0	0	0	1	0	0	1	0	0	0	0	0	0	0	0	0	0	1	0	0	1	0	0	0	1	0	0	1	0	0	1	0	0	1	0	1	1
72A	10	0	0	0	0	0	0	0	0	0	0	0	0	1	0	0	0	0	1	0	0	0	0	0	0	0	0	0	0	1	0	0	0	0	1	0	1	0	0	1	0	0	0	0	0	1	0	1	1
73A	10	1	1	1	0	1	1	0	0	0	1	0	1	0	0	1	0	0	1	0	0	0	0	0	0	0	0	0	0	1	0	0	1	0	1	0	1	0	1	1	0	0	1	0	0	1	0	0	1
74A	10	1	1	1	0	1	1	0	0	0	1	0	1	1	0	1	0	0	1	0	0	0	0	0	0	0	0	0	0	0	0	0	1	0	1	0	1	0	0	1	0	0	1	0	0	1	0	0	1
219	10	0	0	0	0	0	0	0	0	0	0	0	0	0	0	0	0	0	0	0	0	0	0	0	0	0	0	0	0	0	0	0	1	0	0	0	1	0	0	1	0	0	0	0	0	1	0	0	1
220	10	0	0	0	0	0	0	0	0	0	0	0	0	0	0	0	0	0	0	0	0	0	0	0	0	0	0	0	0	0	0	0	1	0	0	0	1	0	0	1	0	0	0	0	0	1	0	0	1
221	10	0	0	0	0	0	0	0	0	0	0	0	0	1	0	0	0	0	1	0	0	0	0	0	0	0	0	0	0	0	0	0	0	0	0	0	0	0	0	1	0	0	0	0	0	0	0	0	0
222	10	0	0	0	0	0	0	0	0	0	0	0	0	0	0	1	0	0	1	0	0	0	0	0	0	0	0	0	0	0	0	0	0	0	0	0	0	0	0	1	0	0	0	0	0	0	0	0	0
223	10	0	0	0	0	0	0	0	0	0	0	0	0	0	0	0	0	0	1	0	0	0	0	0	0	0	0	0	0	0	0	0	0	0	0	1	1	0	0	1	0	0	0	0	0	0	0	0	1
224	10	0	0	0	0	0	0	0	0	0	0	0	0	0	0	1	0	0	1	0	0	0	0	0	0	0	0	0	0	0	0	0	1	0	0	0	1	0	0	1	0	0	0	0	0	1	0	0	1
225	10	0	0	0	0	0	0	0	0	0	0	0	0	0	0	1	0	0	1	0	0	0	0	0	0	0	0	0	0	0	0	0	0	0	0	0	1	0	0	1	0	0	0	0	0	1	0	0	1
226	10	0	0	0	0	0	0	0	0	0	0	0	0	0	0	1	0	0	1	0	0	0	0	0	0	0	0	0	0	0	0	0	0	0	0	0	1	0	0	1	0	0	0	0	0	1	0	0	1
227	10	0	0	0	0	0	0	0	0	0	1	0	0	0	0	1	0	0	1	0	0	0	0	1	0	1	0	0	0	0	0	0	1	0	0	0	1	0	0	1	0	0	0	1	0	1	0	1	1
228	10	0	0	0	0	0	0	0	0	0	0	0	0	0	0	1	1	0	1	0	0	0	0	0	0	0	0	0	0	1	0	0	0	0	1	0	0	0	0	1	0	0	1	1	0	1	0	1	1
229	10	0	0	0	0	0	0	0	0	0	1	0	1	0	0	1	0	0	1	0	1	0	0	0	0	0	0	0	0	0	0	0	0	0	1	0	0	0	0	1	0	0	1	1	0	1	1	0	1
230	10	0	0	0	0	0	0	0	0	0	0	0	1	0	0	1	0	0	1	0	1	0	0	0	0	0	0	0	0	0	0	0	0	0	1	0	0	0	0	1	0	0	1	1	0	1	1	0	1
231	10	0	0	0	0	0	0	0	0	0	0	0	0	0	0	1	0	0	1	0	0	0	0	0	0	0	0	0	0	0	0	0	1	0	0	0	0	0	0	1	0	0	1	1	0	1	1	1	1
232	10	0	0	0	0	0	0	0	0	0	0	0	0	0	0	1	1	0	1	0	0	0	0	0	0	0	0	0	0	0	0	0	1	0	0	0	0	0	0	1	0	0	1	0	0	1	1	1	1
11	11	0	0	0	0	0	0	0	1	0	1	0	0	0	0	1	0	0	1	0	1	0	0	0	1	0	0	0	0	0	0	0	1	0	0	0	0	0	1	0	0	0	0	0	0	1	0	0	1
12	11	0	0	0	0	0	0	0	0	0	1	0	0	0	0	1	0	0	1	0	1	0	0	0	1	0	0	0	0	0	0	0	1	0	0	0	0	0	1	0	0	0	0	0	0	1	0	0	1
13	11	0	0	0	0	0	0	0	0	0	1	0	1	0	0	1	0	0	1	0	1	0	0	0	0	0	0	0	0	0	0	0	1	0	0	0	0	0	1	0	0	0	1	0	0	1	1	0	1
14	11	0	0	0	0	0	0	0	0	0	1	0	0	0	0	1	0	0	1	0	0	0	0	1	0	0	0	0	0	0	0	0	1	0	1	0	0	1	1	0	0	0	0	1	0	1	0	1	1
15	11	1	0	0	0	0	0	0	0	0	1	0	0	0	0	1	0	0	1	0	0	0	0	1	0	0	0	0	0	0	0	0	1	0	1	0	0	0	1	0	0	0	0	0	0	1	0	1	1
16	11	0	0	0	0	0	0	0	1	0	1	0	0	0	0	0	1	0	1	0	0	0	0	0	0	0	0	0	0	0	0	0	0	0	0	0	0	0	1	1	0	0	1	1	0	1	0	0	1
17	11	1	0	0	0	1	0	0	1	0	1	0	0	0	0	1	0	0	1	0	1	0	0	0	0	0	0	0	0	0	0	0	1	0	1	0	1	0	0	1	0	0	1	0	0	1	0	1	1
18	11	0	0	0	0	0	0	0	0	0	1	0	0	0	0	1	1	0	1	0	0	0	0	1	0	0	0	0	0	0	0	0	1	0	1	0	0	0	0	1	0	0	1	1	0	1	0	1	1
19	11	1	0	0	0	0	0	0	0	0	1	0	0	0	0	1	0	0	1	0	0	0	0	1	0	0	0	0	0	0	0	0	1	0	1	0	0	0	0	1	0	0	0	1	0	1	0	0	1
20	11	0	0	0	0	1	0	0	1	0	1	0	0	0	0	1	1	0	1	0	0	0	1	1	0	0	0	0	0	0	0	0	1	0	1	0	0	0	0	1	0	0	1	1	0	1	0	1	1
21	11	0	0	0	0	1	0	0	0	0	1	0	0	0	0	1	1	0	1	0	0	0	1	1	0	0	0	0	0	0	0	0	1	0	1	0	0	0	0	1	0	0	1	1	0	1	0	1	1
22	11	0	0	0	0	1	0	0	1	0	1	0	0	0	0	1	1	0	1	0	0	0	0	0	1	0	0	0	0	0	0	0	1	0	1	0	0	0	1	0	0	0	1	0	0	1	0	0	1
23	11	0	0	0	0	0	0	0	0	0	0	0	0	0	0	0	0	0	1	0	0	0	0	0	0	0	0	0	0	0	0	0	0	0	0	0	0	0	0	1	0	0	0	0	0	0	0	0	0
24	11	0	0	0	0	0	0	0	0	0	0	0	0	0	0	0	0	0	0	0	0	0	0	0	0	0	0	0	0	0	0	0	0	0	0	0	1	0	0	1	0	0	0	0	0	0	0	0	0
1A	12	0	0	0	0	1	0	0	0	0	1	0	0	0	0	1	0	0	1	0	1	0	0	1	0	0	0	0	0	0	0	0	1	0	1	0	0	0	0	1	0	0	0	0	0	1	0	0	1
2A	12	1	0	0	0	1	0	0	1	0	1	0	0	0	0	1	1	0	1	0	1	0	0	0	0	0	0	0	0	0	1	0	1	0	1	0	0	0	1	0	0	0	1	0	0	1	0	0	1
3A	12	0	0	0	0	0	0	0	0	0	1	0	0	0	0	1	1	0	1	0	1	0	0	0	1	0	0	0	0	0	0	0	1	0	1	0	0	0	0	1	0	0	1	0	0	1	1	0	1
4A	12	1	0	0	0	1	0	0	0	0	1	0	0	0	0	0	1	0	1	0	1	0	0	0	0	0	0	0	0	0	0	0	1	0	1	0	0	0	0	1	0	0	1	0	0	1	0	0	1
5A	12	0	0	0	0	0	0	0	1	0	1	0	0	0	0	1	1	0	1	0	1	0	0	1	0	0	0	0	0	0	0	0	1	0	1	0	0	0	0	1	0	0	1	0	0	1	1	0	1
6A	12	0	0	0	0	1	0	0	0	0	1	0	1	0	0	1	0	0	1	0	0	0	0	1	0	0	0	0	0	0	0	0	1	0	0	0	0	0	0	1	0	0	0	0	0	1	0	0	1
7A	12	1	0	0	0	0	0	0	0	0	1	0	0	0	0	1	0	0	1	0	1	0	0	1	1	0	0	0	0	0	0	0	1	0	0	0	0	0	0	1	0	0	1	0	0	1	0	1	1
8A	12	0	0	0	0	0	0	0	0	0	1	0	0	0	0	1	1	0	1	0	1	0	0	0	0	0	0	0	0	0	0	0	1	0	1	0	0	0	1	0	0	0	1	0	0	1	0	0	1
9A	12	1	0	0	0	1	0	0	0	0	1	0	0	0	0	1	0	0	1	0	0	0	0	0	0	0	0	0	0	0	1	0	1	0	1	0	0	0	1	1	0	0	1	0	0	1	0	1	1
97A	13	1	0	0	0	1	0	0	0	0	1	0	0	0	0	1	0	0	1	0	1	0	0	0	1	0	0	0	0	0	0	0	0	0	0	0	1	0	1	0	0	0	0	0	0	1	0	1	1
98A	13	1	1	0	0	1	0	0	0	0	1	0	0	1	0	1	0	0	1	0	1	0	0	0	1	0	0	0	0	0	0	0	0	0	0	1	0	0	1	0	0	0	0	0	0	1	0	1	1
99A	13	1	0	0	0	0	0	0	0	0	1	0	0	0	0	1	0	0	1	0	0	0	0	0	1	0	0	0	0	1	0	0	1	0	1	0	0	0	0	1	0	0	0	0	0	1	0	1	1
100A	13	1	1	0	0	0	0	0	0	0	1	0	0	0	0	1	0	0	1	0	0	0	0	0	1	0	1	0	0	0	1	0	1	0	0	0	0	0	0	1	0	0	0	0	0	1	0	0	1
101A	13	1	1	0	0	0	0	0	0	0	1	0	0	0	0	1	0	0	1	0	1	0	0	1	0	0	1	0	0	0	0	0	1	0	0	0	0	0	0	1	0	0	1	0	0	1	1	0	1
102A	13	1	1	0	0	1	0	0	0	0	1	0	0	0	0	1	0	0	1	0	1	0	0	1	1	0	0	0	0	0	0	0	1	0	0	0	0	0	1	1	0	0	0	1	0	1	0	0	1
103A	13	1	0	0	0	0	0	0	0	0	1	0	0	0	0	1	0	0	1	0	0	0	0	1	0	0	0	0	0	0	0	0	1	0	0	0	0	0	1	1	0	0	0	0	0	1	1	0	1
104A	14	1	1	0	0	0	1	0	0	0	1	1	1	1	0	1	0	0	1	0	0	0	0	0	1	0	0	0	0	0	0	0	1	0	0	0	1	0	1	1	0	1	0	1	0	1	1	0	1
105A	14	1	1	0	0	0	1	1	0	0	0	0	1	0	0	1	1	0	1	0	0	0	1	0	0	0	0	0	0	0	0	0	1	0	0	0	0	0	1	1	0	0	0	0	0	1	1	0	1
106A	14	1	0	0	0	0	0	0	0	0	0	0	1	0	0	1	0	0	1	0	1	0	0	0	0	0	0	0	0	0	0	0	0	0	0	1	1	1	0	1	0	0	1	0	0	1	1	0	0
107A	14	1	0	0	0	0	1	1	0	0	0	0	1	0	0	1	0	0	1	0	0	0	1	0	0	0	0	0	0	0	0	0	0	0	0	0	1	0	0	1	0	0	0	0	0	0	0	0	0
108A	14	0	0	0	1	1	1	0	0	0	1	0	0	0	0	1	1	1	1	0	0	0	1	1	1	0	0	0	0	0	0	0	0	0	0	0	0	0	1	0	1	0	1	0	0	0	1	0	1
109A	14	1	0	0	0	0	1	0	0	0	0	0	1	0	0	1	0	0	1	0	0	0	0	1	0	0	0	0	0	0	0	0	1	0	0	0	0	0	0	1	0	0	0	0	0	1	1	0	1
158A	15	0	0	0	0	1	0	0	0	0	1	0	0	0	0	1	0	0	1	0	0	0	0	1	1	0	0	0	0	1	0	0	0	0	0	0	0	0	0	1	0	0	0	0	0	1	0	1	1
159A	15	0	0	0	0	0	0	0	0	0	1	0	0	0	0	1	0	0	1	0	1	0	0	1	1	0	0	0	0	0	0	0	1	0	0	0	0	0	1	1	0	0	0	0	0	1	0	0	1
160A	15	0	0	0	0	0	0	0	0	0	1	0	0	0	0	1	0	0	1	0	1	0	0	1	1	0	0	0	0	0	0	0	1	0	0	0	0	0	0	1	0	0	0	0	0	1	0	0	1
161A	15	0	0	0	0	0	0	0	0	0	1	0	0	0	0	1	0	0	1	0	1	0	0	1	0	0	0	0	0	0	0	0	0	0	1	0	0	0	1	1	0	0	0	0	0	1	0	0	1
162A	15	0	0	0	0	0	0	0	1	0	1	0	0	0	0	1	0	0	1	0	0	0	0	1	0	0	0	0	0	0	0	0	0	0	0	0	0	0	1	1	0	0	0	1	0	1	0	0	1
163A	15	1	0	0	0	0	0	0	1	0	1	0	0	0	0	1	0	0	1	0	1	0	0	1	0	0	0	0	0	0	0	0	1	0	0	0	0	0	1	0	0	1	1	0	0	1	0	0	1
164A	15	1	0	0	0	0	0	0	1	0	1	0	0	0	0	1	0	0	1	0	0	0	0	0	0	0	0	0	0	0	0	0	1	0	1	0	0	0	1	0	0	1	1	0	0	1	0	0	1
165A	15	0	0	0	0	0	0	0	1	0	0	0	0	0	0	1	0	0	1	0	0	0	0	0	0	0	0	0	0	0	0	0	0	0	0	0	0	0	0	0	0	0	0	0	0	0	0	0	0
166A	15	0	0	0	0	0	0	0	0	0	1	0	0	0	0	1	0	0	1	0	0	0	0	1	1	0	0	0	0	0	0	0	1	0	0	0	0	0	1	0	0	0	0	0	0	1	0	0	1
149A	16	0	1	0	0	0	0	0	0	0	1	0	0	0	0	1	0	0	1	0	0	0	0	1	1	0	0	0	0	1	0	0	0	0	0	0	0	0	0	1	0	0	0	0	0	1	0	1	1
150A	16	0	0	0	0	0	0	0	0	0	1	0	0	1	0	1	0	0	1	0	1	0	0	0	1	0	0	0	0	0	0	0	0	0	0	0	0	0	0	1	0	0	1	1	0	1	1	0	1
151A	16	1	1	0	0	0	0	0	0	0	1	0	0	1	0	1	0	0	1	0	1	0	0	0	1	0	0	0	0	1	0	0	1	0	0	0	0	0	1	1	0	0	0	0	0	1	0	1	1
152A	16	1	0	0	0	1	0	0	1	0	1	0	0	0	0	1	0	0	1	0	0	0	0	0	1	0	0	0	0	1	0	0	1	0	0	0	0	0	0	1	0	0	1	0	0	1	0	0	1
153A	16	1	1	0	0	0	0	0	1	0	1	0	0	1	0	1	0	0	1	0	1	0	1	1	1	0	0	0	0	0	0	0	1	0	0	0	0	0	0	1	0	0	0	0	0	1	0	1	1
154A	16	1	1	0	0	1	0	0	0	0	1	0	0	0	0	1	0	0	1	0	1	0	0	1	1	0	0	0	0	0	0	0	1	0	0	0	0	0	0	1	0	0	0	1	0	1	0	0	1
155A	16	1	1	0	0	1	0	0	0	0	1	0	0	1	0	1	0	0	1	0	1	0	1	1	1	0	0	0	0	0	0	0	1	0	0	0	0	0	0	1	0	0	0	0	0	1	0	1	1
156A	16	1	1	0	0	0	0	0	0	0	1	0	0	0	0	1	0	0	1	0	0	0	0	1	0	0	0	0	0	1	0	0	1	0	0	0	0	0	1	1	0	0	0	1	0	1	0	1	1
157A	16	1	1	0	0	1	0	0	0	0	1	0	0	0	0	1	0	0	1	0	0	0	0	1	0	0	0	0	0	0	0	0	1	0	0	0	0	0	1	0	0	0	1	0	0	1	1	0	1
169A	17	1	0	0	0	0	0	0	0	0	1	0	0	0	0	1	0	0	1	0	0	0	0	1	1	0	0	0	0	0	0	0	0	0	1	0	0	0	1	0	0	0	0	0	0	1	0	0	1
170A	17	1	1	0	0	1	0	0	0	0	1	0	0	0	0	1	0	0	1	0	1	0	0	1	1	0	0	0	0	0	0	0	1	0	0	0	0	0	1	0	0	0	0	1	0	1	0	0	1
171A	17	1	0	0	0	0	0	0	0	0	1	0	0	0	0	1	0	0	1	0	0	0	0	1	1	0	0	0	0	1	0	0	1	0	1	0	0	0	0	1	0	0	1	0	0	1	0	0	1
172A	17	0	0	0	0	0	0	0	0	0	1	0	0	0	0	1	0	0	1	0	0	0	0	1	0	0	0	0	0	0	0	0	0	0	1	0	0	0	0	1	0	0	0	0	0	1	0	0	1
173A	17	1	1	0	0	0	0	0	0	0	1	0	0	1	0	1	0	0	1	0	1	0	0	1	0	0	0	0	0	1	0	0	1	0	1	0	0	0	1	0	0	0	0	0	0	1	0	0	1
174A	17	0	0	0	0	0	0	0	0	0	1	0	0	0	0	1	0	0	1	0	1	0	0	1	0	0	0	0	0	1	0	0	0	0	1	0	0	0	0	1	0	0	1	1	0	0	0	1	1
175A	17	1	1	0	0	0	0	0	0	0	1	0	0	0	0	1	0	0	1	0	0	0	0	1	1	0	0	0	0	1	0	0	1	0	1	0	0	0	1	0	0	0	0	0	0	0	0	0	1
176A	17	1	0	0	0	1	0	0	0	0	1	0	0	1	0	1	0	0	1	0	0	0	0	1	1	0	0	0	0	1	0	0	0	0	0	0	0	0	1	1	0	0	1	0	0	1	0	0	1
177A	17	0	1	0	0	1	0	0	0	0	1	0	0	0	0	1	0	0	1	0	1	0	0	1	1	0	0	0	0	1	0	0	0	0	1	0	0	0	0	1	0	0	1	0	0	1	0	1	1
178A	17	0	1	0	0	0	0	0	0	0	1	0	0	0	0	1	0	0	1	0	1	0	0	1	0	0	0	0	0	0	0	0	1	0	0	0	0	1	0	1	0	0	1	0	0	1	0	1	1
[truncated: 27 more columns]
